# Supplementary material for: Chikungunya Virus Diagnosis: A Review of Current Antigen Detection Methods
Source: MDPI journal article supplement (doi:10.3390/tropicalmed8070365), 2023-07-17
Supplement: s1 [file s1]

Reference sequence (1): sp|Q8JUX5.3|POL5  
Identities normalised by aligned length.  
Colored by: identity

|  |  |  | cov | pid | 1 | : | : | : | : | : | : | : | : | : | : | : | : | : | : | : | : | : | : | : | : | : | : | : | : | : | : | : | : | : | : | : | : | : | : | : | : | : | : | : | : | : | : | : | : | : | : | : | : | : | : | : | : | : | : | : | : | : | : | : | : | : | : | : | : | : | : | : | : | : | : | : | : | : | : | : | : | : | : | : | : | : | : | : | : | : | : | : | : | : | : | : | : | : | : | : | : | : | : | : | : | : | : | : | : | : | : | : | : | : | : | : | : | : | : | : | : | : | : | : | : | : | : | : | : | : | : | : | : | : | : | : | : | : | : | : | : | : | : | : | : | : | : | : | : | : | : | : | : | : | : | : | : | : | : | : | : | : | : | : | : | : | : | : | : | : | : | : | : | : | : | : | : | : | : | : | : | : | : | : | : | : | : | : | : | : | : | : | : | : | : | : | : | : | : | : | : | : | : | : | : | : | : | : | : | : | : | : | : | : | : | : | : | : | : | : | : | : | : | : | : | : | : | : | : | : | : | : | : | : | : | : | : | : | : | : | : | : | : | : | : | : | : | : | : | : | : | : | : | : | : | : | : | : | : | : | : | : | : | : | : | : | : | : | : | : | : | : | : | : | : | : | : | : | : | : | : | : | : | : | : | : | : | : | : | : | : | : | : | : | : | : | : | : | : | : | : | : | : | : | : | : | : | : | : | : | : | : | : | : | : | : | : | : | : | : | : | : | : | : | : | : | : | : | : | : | : | : | : | : | : | : | : | : | : | : | : | : | : | : | : | : | : | : | : | : | : | : | : | : | : | : | : | : | : | : | : | : | : | : | : | : | : | : | : | : | : | : | : | : | : | : | : | : | : | : | : | : | : | : | : | : | : | : | : | : | : | : | : | : | : | : | : | : | : | : | : | : | : | : | : | : | : | : | : | : | : | : | : | : | : | : | : | : | : | : | : | : | : | : | : | : | : | : | : | : | : | : | : | : | : | : | : | : | : | : | : | : | : | : | : | : | : | : | : | : | : | : | : | : | : | : | : | : | : | : | : | : | : | : | : | : | : | : | : | : | : | : | : | : | : | : | : | : | : | : | : | : | : | : | : | : | : | : | : | : | : | : | : | : | : | : | : | : | : | : | : | : | : | : | : | : | : | : | : | : | : | : | : | : | : | : | : | : | : | : | : | : | : | : | : | : | : | : | : | : | : | : | : | : | : | : | : | : | : | : | : | : | : | : | : | : | : | : | : | : | : | : | : | : | : | : | : | : | : | : | : | : | : | : | : | : | : | : | : | : | : | : | : | : | : | : | : | : | : | : | : | : | : | : | : | : | : | : | : | : | : | : | : | : | : | : | : | : | : | : | : | : | : | : | : | : | : | : | : | : | : | : | : | : | : | : | : | : | : | : | : | : | : | : | : | : | : | : | : | : | : | : | : | : | : | : | : | : | : | : | : | : | : | : | : | : | : | : | : | : | : | : | : | : | : | : | : | : | : | : | : | : | : | : | : | : | : | : | : | : | : | : | : | : | : | : | : | : | : | : | : | : | : | : | : | : | : | : | : | : | : | : | : | : | : | : | : | : | : | : | : | : | : | : | : | : | : | : | : | : | : | : | : | : | : | : | : | : | : | : | : | : | : | : | : | : | : | : | : | : | : | : | : | : | : | : | : | : | : | : | : | : | : | : | : | : | : | : | : | : | : | : | : | : | : | : | : | : | : | : | : | : | : | : | : | : | : | : | : | : | : | : | : | : | : | : | : | : | : | : | : | : | : | : | : | : | : | : | : | : | : | : | : | : | : | : | : | : | : | : | : | : | : | : | : | : | : | : | : | : | : | : | : | : | : | : | : | : | : | : | : | : | : | : | : | : | : | : | : | : | : | : | : | : | : | : | : | : | : | : | : | : | : | : | : | : | : | : | : | : | : | : | : | : | : | : | : | : | : | : | : | : | : | : | : | : | : | : | : | : | : | : | : | : | : | : | : | : | : | : | : | : | : | : | : | : | : | : | : | : | : | : | : | : | : | : | : | : | : | : | : | : | : | : | : | : | : | : | : | : | : | : | : | : | : | : | : | : | : | : | : | : | : | : | : | : | : | : | : | : | : | : | : | : | : | : | : | : | : | : | : | : | : | : | : | : | : | : | : | : | : | : | : | : | : | : | : | : | : | : | : | : | : | : | : | : | : | : | : | : | : | : | : | : | : | : | : | : | : | : | : | : | : | : | : | : | : | : | : | : | : | : | : | : | : | : | : | : | : | : | : | : | : | : | : | : | : | : | : | : | : | : | : | : | : | : | : | : | : | : | : | : | : | : | : | : | : | : | : | : | : | : | : | : | : | : | : | : | : | : | : | : | : | : | : | : | : | : | : | : | : | : | : | : | : | : | : | : | : | : | : | : | : | : | : | : | : | : | : | : | : | : | : | : | : | : | : | : | : | : | : | : | : | : | : | : | : | : | : | : | : | : | : | : | : | : | : | : | : | : | : | : | : | : | : | : | : | : | : | : | : | : | : | : | : | : | : | : | : | : | : | : | : | : | : | : | : | : | : | : | : | : | : | : | : | : | : | : | : | : | : | : | : | : | : | : | : | : | : | : | : | : | : | : | : | : | : | : | : | : | : | : | : | : | : | : | : | : | : | : | : | : | : | : | : | : | : | : | : | : | : | : | : | : | : | : | : | : | : | : | : | : | : | : | : | : | : | : | : | : | : | : | : | : | : | : | : | : | : | : | : | : | : | : | : | : | : | : | : | : | : | : | : | : | : | : | : | : | : | : | : | : | : | : | : | : | : | : | : | : | : | : | : | : | : | : | : | : | : | : | : | : | : | : | : | : | : | : | : | : | : | : | : | : | : | : | : | : | : | : | : | : | : | : | : | : | : | : | : | : | : | : | : | : | : | : | : | : | : | : | : | : | : | : | : | : | : | : | : | : | : | : | : | : | : | : | : | : | : | : | : | : | : | : | : | : | : | : | : | : | : | : | : | : | : | : | : | : | : | : | : | : | : | : | : | : | : | : | : | : | : | : | : | : | : | : | : | : | : | : | : | : | : | : | : | : | : | : | : | : | : | : | : | : | : | : | : | : | : | : | : | : | : | : | : | : | : | : | : | : | : | : | : | : | : | : | : | : | : | : | : | : | : | : | : | : | : | : | : | : | : | : | : | : | : | : | : | : | : | : | : | : | : | : | : | : | : | : | : | : | : | : | : | : | : | : | : | : | : | : | : | : | : | : | : | : | : | : | : | : | : | : | : | : | : | : | : | : | : | : | : | : | : | : | : | : | : | : | : | : | : | : | : | : | : | : | : | : | : | : | : | : | : | : | : | : | : | : | : | : | : | : | : | : | : | : | : | : | : | : | : | : | : | : | : | : | : | : | : | : | : | : | : | : | : | : | : | : | : | : | : | : | : | : | : | : | : | : | : | : | : | : | : | : | : | : | : | : | : | : | : | : | : | : | : | : | : | : | : | : | : | : | : | : | : | : | : | : | : | : | : | : | : | : | : | : | : | : | : | : | : | : | : | : | : | : | : | : | : | : | : | : | : | : | : | : | : | : | : | : | : | : | : | : | : | : | : | : | : | : | : | : | : | : | : | : | : | : | : | : | : | : | : | : | : | : | : | : | : | : | : | : | : | : | : | : | : | : | : | : | : | : | : | : | : | : | : | : | : | : | : | : | : | : | : | : | : | : | : | : | : | : | : | : | : | : | : | : | : | : | : | : | : | : | : | : | : | : | : | : | : | : | : | : | : | : | : | : | : | : | : | : | : | : | : | : | : | : | : | : | : | : | : | : | : | : | : | : | : | : | : | : | : | : | : | : | : | : | : | : | : | : | :</ |
|--|--|--|-----|-----|---|---|---|---|---|---|---|---|---|---|---|---|---|---|---|---|---|---|---|---|---|---|---|---|---|---|---|---|---|---|---|---|---|---|---|---|---|---|---|---|---|---|---|---|---|---|---|---|---|---|---|---|---|---|---|---|---|---|---|---|---|---|---|---|---|---|---|---|---|---|---|---|---|---|---|---|---|---|---|---|---|---|---|---|---|---|---|---|---|---|---|---|---|---|---|---|---|---|---|---|---|---|---|---|---|---|---|---|---|---|---|---|---|---|---|---|---|---|---|---|---|---|---|---|---|---|---|---|---|---|---|---|---|---|---|---|---|---|---|---|---|---|---|---|---|---|---|---|---|---|---|---|---|---|---|---|---|---|---|---|---|---|---|---|---|---|---|---|---|---|---|---|---|---|---|---|---|---|---|---|---|---|---|---|---|---|---|---|---|---|---|---|---|---|---|---|---|---|---|---|---|---|---|---|---|---|---|---|---|---|---|---|---|---|---|---|---|---|---|---|---|---|---|---|---|---|---|---|---|---|---|---|---|---|---|---|---|---|---|---|---|---|---|---|---|---|---|---|---|---|---|---|---|---|---|---|---|---|---|---|---|---|---|---|---|---|---|---|---|---|---|---|---|---|---|---|---|---|---|---|---|---|---|---|---|---|---|---|---|---|---|---|---|---|---|---|---|---|---|---|---|---|---|---|---|---|---|---|---|---|---|---|---|---|---|---|---|---|---|---|---|---|---|---|---|---|---|---|---|---|---|---|---|---|---|---|---|---|---|---|---|---|---|---|---|---|---|---|---|---|---|---|---|---|---|---|---|---|---|---|---|---|---|---|---|---|---|---|---|---|---|---|---|---|---|---|---|---|---|---|---|---|---|---|---|---|---|---|---|---|---|---|---|---|---|---|---|---|---|---|---|---|---|---|---|---|---|---|---|---|---|---|---|---|---|---|---|---|---|---|---|---|---|---|---|---|---|---|---|---|---|---|---|---|---|---|---|---|---|---|---|---|---|---|---|---|---|---|---|---|---|---|---|---|---|---|---|---|---|---|---|---|---|---|---|---|---|---|---|---|---|---|---|---|---|---|---|---|---|---|---|---|---|---|---|---|---|---|---|---|---|---|---|---|---|---|---|---|---|---|---|---|---|---|---|---|---|---|---|---|---|---|---|---|---|---|---|---|---|---|---|---|---|---|---|---|---|---|---|---|---|---|---|---|---|---|---|---|---|---|---|---|---|---|---|---|---|---|---|---|---|---|---|---|---|---|---|---|---|---|---|---|---|---|---|---|---|---|---|---|---|---|---|---|---|---|---|---|---|---|---|---|---|---|---|---|---|---|---|---|---|---|---|---|---|---|---|---|---|---|---|---|---|---|---|---|---|---|---|---|---|---|---|---|---|---|---|---|---|---|---|---|---|---|---|---|---|---|---|---|---|---|---|---|---|---|---|---|---|---|---|---|---|---|---|---|---|---|---|---|---|---|---|---|---|---|---|---|---|---|---|---|---|---|---|---|---|---|---|---|---|---|---|---|---|---|---|---|---|---|---|---|---|---|---|---|---|---|---|---|---|---|---|---|---|---|---|---|---|---|---|---|---|---|---|---|---|---|---|---|---|---|---|---|---|---|---|---|---|---|---|---|---|---|---|---|---|---|---|---|---|---|---|---|---|---|---|---|---|---|---|---|---|---|---|---|---|---|---|---|---|---|---|---|---|---|---|---|---|---|---|---|---|---|---|---|---|---|---|---|---|---|---|---|---|---|---|---|---|---|---|---|---|---|---|---|---|---|---|---|---|---|---|---|---|---|---|---|---|---|---|---|---|---|---|---|---|---|---|---|---|---|---|---|---|---|---|---|---|---|---|---|---|---|---|---|---|---|---|---|---|---|---|---|---|---|---|---|---|---|---|---|---|---|---|---|---|---|---|---|---|---|---|---|---|---|---|---|---|---|---|---|---|---|---|---|---|---|---|---|---|---|---|---|---|---|---|---|---|---|---|---|---|---|---|---|---|---|---|---|---|---|---|---|---|---|---|---|---|---|---|---|---|---|---|---|---|---|---|---|---|---|---|---|---|---|---|---|---|---|---|---|---|---|---|---|---|---|---|---|---|---|---|---|---|---|---|---|---|---|---|---|---|---|---|---|---|---|---|---|---|---|---|---|---|---|---|---|---|---|---|---|---|---|---|---|---|---|---|---|---|---|---|---|---|---|---|---|---|---|---|---|---|---|---|---|---|---|---|---|---|---|---|---|---|---|---|---|---|---|---|---|---|---|---|---|---|---|---|---|---|---|---|---|---|---|---|---|---|---|---|---|---|---|---|---|---|---|---|---|---|---|---|---|---|---|---|---|---|---|---|---|---|---|---|---|---|---|---|---|---|---|---|---|---|---|---|---|---|---|---|---|---|---|---|---|---|---|---|---|---|---|---|---|---|---|---|---|---|---|---|---|---|---|---|---|---|---|---|---|---|---|---|---|---|---|---|---|---|---|---|---|---|---|---|---|---|---|---|---|---|---|---|---|---|---|---|---|---|---|---|---|---|---|---|---|---|---|---|---|---|---|---|---|---|---|---|---|---|---|---|---|---|---|---|---|---|---|---|---|---|---|---|---|---|---|---|---|---|---|---|---|---|---|---|---|---|---|---|---|---|---|---|---|---|---|---|---|---|---|---|---|---|---|---|---|---|---|---|---|---|---|---|---|---|---|---|---|---|---|---|---|---|---|---|---|---|---|---|---|---|---|---|---|---|---|---|---|---|---|---|---|---|---|---|---|---|---|---|---|---|---|---|---|---|---|---|---|---|---|---|---|---|---|---|---|---|---|---|---|---|---|---|---|---|---|---|---|---|---|---|---|---|---|---|---|---|---|---|---|---|---|---|---|---|---|---|---|---|---|---|---|---|---|---|---|---|---|---|---|---|---|---|---|---|---|---|---|---|---|---|---|---|---|---|---|---|---|---|---|---|---|---|---|---|---|---|---|---|---|---|---|---|---|---|---|---|---|---|---|---|---|---|---|---|---|---|---|---|---|---|---|---|---|---|---|---|---|---|---|---|---|---|---|---|---|---|---|---|---|---|---|---|---|---|---|---|---|---|---|---|---|---|---|---|---|---|---|---|---|---|---|---|---|---|---|---|---|---|---|---|---|---|---|---|---|---|---|---|---|---|---|---|---|---|---|---|---|---|---|---|---|---|---|---|---|---|---|---|---|---|---|---|---|---|---|---|---|---|---|---|---|---|---|---|---|---|---|---|---|---|---|---|---|---|---|---|---|---|---|---|---|---|---|---|---|---|---|---|---|---|---|---|---|---|---|---|---|---|---|---|---|---|---|---|---|---|---|---|---|---|---|---|---|---|---|---|---|---|---|---|---|---|---|---|---|---|---|---|---|---|---|---|---|---|---|---|---|---|---|---|---|---|---|---|---|---|---|---|---|---|---|---|---|---|---|---|---|---|---|---|---|---|---|---|---|---|---|---|---|---|---|---|---|---|---|---|---|---|---|---|---|---|---|---|---|---|---|---|---|---|---|---|---|---|---|---|---|---|---|---|---|---|---|---|---|---|---|---|---|---|---|---|---|---|---|---|---|---|---|---|---|---|---|---|---|---|---|---|---|---|---|---|---|---|---|---|---|---|---|---|---|---|---|---|---|---|---|---|---|---|---|---|---|---|---|---|---|---|---|---|---|---|---|---|---|---|---|---|---|---|---|---|---|---|---|---|---|---|---|---|---|---|---|---|---|---|---|---|---|---|---|---|---|---|---|---|---|---|---|---|---|---|---|---|---|---|---|---|---|---|---|---|---|---|---|---|---|---|---|---|---|---|---|---|---|---|---|-----|
|--|--|--|-----|-----|---|---|---|---|---|---|---|---|---|---|---|---|---|---|---|---|---|---|---|---|---|---|---|---|---|---|---|---|---|---|---|---|---|---|---|---|---|---|---|---|---|---|---|---|---|---|---|---|---|---|---|---|---|---|---|---|---|---|---|---|---|---|---|---|---|---|---|---|---|---|---|---|---|---|---|---|---|---|---|---|---|---|---|---|---|---|---|---|---|---|---|---|---|---|---|---|---|---|---|---|---|---|---|---|---|---|---|---|---|---|---|---|---|---|---|---|---|---|---|---|---|---|---|---|---|---|---|---|---|---|---|---|---|---|---|---|---|---|---|---|---|---|---|---|---|---|---|---|---|---|---|---|---|---|---|---|---|---|---|---|---|---|---|---|---|---|---|---|---|---|---|---|---|---|---|---|---|---|---|---|---|---|---|---|---|---|---|---|---|---|---|---|---|---|---|---|---|---|---|---|---|---|---|---|---|---|---|---|---|---|---|---|---|---|---|---|---|---|---|---|---|---|---|---|---|---|---|---|---|---|---|---|---|---|---|---|---|---|---|---|---|---|---|---|---|---|---|---|---|---|---|---|---|---|---|---|---|---|---|---|---|---|---|---|---|---|---|---|---|---|---|---|---|---|---|---|---|---|---|---|---|---|---|---|---|---|---|---|---|---|---|---|---|---|---|---|---|---|---|---|---|---|---|---|---|---|---|---|---|---|---|---|---|---|---|---|---|---|---|---|---|---|---|---|---|---|---|---|---|---|---|---|---|---|---|---|---|---|---|---|---|---|---|---|---|---|---|---|---|---|---|---|---|---|---|---|---|---|---|---|---|---|---|---|---|---|---|---|---|---|---|---|---|---|---|---|---|---|---|---|---|---|---|---|---|---|---|---|---|---|---|---|---|---|---|---|---|---|---|---|---|---|---|---|---|---|---|---|---|---|---|---|---|---|---|---|---|---|---|---|---|---|---|---|---|---|---|---|---|---|---|---|---|---|---|---|---|---|---|---|---|---|---|---|---|---|---|---|---|---|---|---|---|---|---|---|---|---|---|---|---|---|---|---|---|---|---|---|---|---|---|---|---|---|---|---|---|---|---|---|---|---|---|---|---|---|---|---|---|---|---|---|---|---|---|---|---|---|---|---|---|---|---|---|---|---|---|---|---|---|---|---|---|---|---|---|---|---|---|---|---|---|---|---|---|---|---|---|---|---|---|---|---|---|---|---|---|---|---|---|---|---|---|---|---|---|---|---|---|---|---|---|---|---|---|---|---|---|---|---|---|---|---|---|---|---|---|---|---|---|---|---|---|---|---|---|---|---|---|---|---|---|---|---|---|---|---|---|---|---|---|---|---|---|---|---|---|---|---|---|---|---|---|---|---|---|---|---|---|---|---|---|---|---|---|---|---|---|---|---|---|---|---|---|---|---|---|---|---|---|---|---|---|---|---|---|---|---|---|---|---|---|---|---|---|---|---|---|---|---|---|---|---|---|---|---|---|---|---|---|---|---|---|---|---|---|---|---|---|---|---|---|---|---|---|---|---|---|---|---|---|---|---|---|---|---|---|---|---|---|---|---|---|---|---|---|---|---|---|---|---|---|---|---|---|---|---|---|---|---|---|---|---|---|---|---|---|---|---|---|---|---|---|---|---|---|---|---|---|---|---|---|---|---|---|---|---|---|---|---|---|---|---|---|---|---|---|---|---|---|---|---|---|---|---|---|---|---|---|---|---|---|---|---|---|---|---|---|---|---|---|---|---|---|---|---|---|---|---|---|---|---|---|---|---|---|---|---|---|---|---|---|---|---|---|---|---|---|---|---|---|---|---|---|---|---|---|---|---|---|---|---|---|---|---|---|---|---|---|---|---|---|---|---|---|---|---|---|---|---|---|---|---|---|---|---|---|---|---|---|---|---|---|---|---|---|---|---|---|---|---|---|---|---|---|---|---|---|---|---|---|---|---|---|---|---|---|---|---|---|---|---|---|---|---|---|---|---|---|---|---|---|---|---|---|---|---|---|---|---|---|---|---|---|---|---|---|---|---|---|---|---|---|---|---|---|---|---|---|---|---|---|---|---|---|---|---|---|---|---|---|---|---|---|---|---|---|---|---|---|---|---|---|---|---|---|---|---|---|---|---|---|---|---|---|---|---|---|---|---|---|---|---|---|---|---|---|---|---|---|---|---|---|---|---|---|---|---|---|---|---|---|---|---|---|---|---|---|---|---|---|---|---|---|---|---|---|---|---|---|---|---|---|---|---|---|---|---|---|---|---|---|---|---|---|---|---|---|---|---|---|---|---|---|---|---|---|---|---|---|---|---|---|---|---|---|---|---|---|---|---|---|---|---|---|---|---|---|---|---|---|---|---|---|---|---|---|---|---|---|---|---|---|---|---|---|---|---|---|---|---|---|---|---|---|---|---|---|---|---|---|---|---|---|---|---|---|---|---|---|---|---|---|---|---|---|---|---|---|---|---|---|---|---|---|---|---|---|---|---|---|---|---|---|---|---|---|---|---|---|---|---|---|---|---|---|---|---|---|---|---|---|---|---|---|---|---|---|---|---|---|---|---|---|---|---|---|---|---|---|---|---|---|---|---|---|---|---|---|---|---|---|---|---|---|---|---|---|---|---|---|---|---|---|---|---|---|---|---|---|---|---|---|---|---|---|---|---|---|---|---|---|---|---|---|---|---|---|---|---|---|---|---|---|---|---|---|---|---|---|---|---|---|---|---|---|---|---|---|---|---|---|---|---|---|---|---|---|---|---|---|---|---|---|---|---|---|---|---|---|---|---|---|---|---|---|---|---|---|---|---|---|---|---|---|---|---|---|---|---|---|---|---|---|---|---|---|---|---|---|---|---|---|---|---|---|---|---|---|---|---|---|---|---|---|---|---|---|---|---|---|---|---|---|---|---|---|---|---|---|---|---|---|---|---|---|---|---|---|---|---|---|---|---|---|---|---|---|---|---|---|---|---|---|---|---|---|---|---|---|---|---|---|---|---|---|---|---|---|---|---|---|---|---|---|---|---|---|---|---|---|---|---|---|---|---|---|---|---|---|---|---|---|---|---|---|---|---|---|---|---|---|---|---|---|---|---|---|---|---|---|---|---|---|---|---|---|---|---|---|---|---|---|---|---|---|---|---|---|---|---|---|---|---|---|---|---|---|---|---|---|---|---|---|---|---|---|---|---|---|---|---|---|---|---|---|---|---|---|---|---|---|---|---|---|---|---|---|---|---|---|---|---|---|---|---|---|---|---|---|---|---|---|---|---|---|---|---|---|---|---|---|---|---|---|---|---|---|---|---|---|---|---|---|---|---|---|---|---|---|---|---|---|---|---|---|---|---|---|---|---|---|---|---|---|---|---|---|---|---|---|---|---|---|---|---|---|---|---|---|---|---|---|---|---|---|---|---|---|---|---|---|---|---|---|---|---|---|---|---|---|---|---|---|---|---|---|---|---|---|---|---|---|---|---|---|---|---|---|---|---|---|---|---|---|---|---|---|---|---|---|---|---|---|---|---|---|---|---|---|---|---|---|---|---|---|---|---|---|---|---|---|---|---|---|---|---|---|---|---|---|---|---|---|---|---|---|---|---|---|---|---|---|---|---|---|---|---|---|---|---|---|---|---|---|---|---|---|---|---|---|---|---|---|---|---|---|---|---|---|---|---|---|---|---|---|---|---|---|---|---|---|---|---|---|---|---|---|---|---|---|---|---|---|---|---|---|---|---|---|---|---|---|---|---|---|---|---|---|---|---|---|---|---|---|---|---|---|---|---|---|---|---|---|---|---|---|---|---|---|---|---|---|---|---|---|---|---|---|---|---|---|---|---|---|---|---|---|-----|

|                |    |          | cov   | pid    | 81     | .                                                                                | 1                                   | .                        | .                        | : | 160 |
|----------------|----|----------|-------|--------|--------|----------------------------------------------------------------------------------|-------------------------------------|--------------------------|--------------------------|---|-----|
| 1              | sp | Q8JUX5.3 | POLS  | 100.0% | 100.0% | PCTITGTMGHFILARCPKGETLVGFTDSRKLSHSC                                              | THPFHHD                             | PPVIGREKFHSR             | QHGKELPCSTYVQSNAATAEEIEV |   |     |
| 2              | sp | Q5WQY5.1 | POLS  | 100.0% | 95.3%  | PCTITGTMGHFILARCPKGETLVGFTDGRKLSHSC                                              | THPFHHD                             | PPVIGREKFHSR             | QHGKELPCSTYVQSNAATAEEIEV |   |     |
| 3              | sp | P0DOK1.1 | POLSF | 100.0% | 99.5%  | PCTITGTMGHFILARCPKGETLVGFTDSRKLSHSC                                              | THPFHHD                             | PPVIGREKFHSR             | QHGKELPCSTYVQSNAATAEEIEV |   |     |
| 4              | sp | Q5XXP3.1 | POLS  | 100.0% | 92.8%  | PCTITGTMGHFILARCPKGETLVGFTDSRKLSHSC                                              | THPFHHD                             | PPVIGREKFHSR             | QHGKELPCSTYVQSNAATAEEIEV |   |     |
| 5              | sp | P22056.1 | POLS  | 100.0% | 82.7%  | PCTITGTMGHFILARCPKGETLVGFTDSRRLSHTCMH                                            | PFHHEPPLIGREKFHSR                   | QHGKELPCSTYVHTTAATAEEIEV |                          |   |     |
| 6              | sp | O90371.1 | POLS  | 100.0% | 82.9%  | PCTITGTMGHFILARCPKGETLVGFTDSRRLSHTCMH                                            | PFHHEPPLIGREKFHSR                   | QHGKELPCSTYVHTTAATAEEIEV |                          |   |     |
| 7              | sp | O90369.1 | POLS  | 100.0% | 82.9%  | PCTITGTMGHFILARCPKGETLVGFTDSRRLSHTCMH                                            | PFHHEPPLIGREKFHSR                   | QHGKELPCSTYVHTTAATAEEIEV |                          |   |     |
| 8              | sp | Q86925.2 | POLS  | 99.3%  | 35.9%  | PCLHLSHKGYFVIVKCPPGDSITSLK-VHGS                                                  | QDTCTIPMRVGKVFVGREKYTLPPMHGTQIPCLTY | VERTREKSAGYVTM           |                          |   |     |
| 9              | sp | P89946.2 | POLS  | 99.3%  | 40.9%  | PCDILATMGHFILARCPGSGQVEVSLSTDPK--LL                                              | CRTPESFKPRFIGNEKSPAPTGHKTRIPCKTY    | SHQDGLTREEITM            |                          |   |     |
| 10             | sp | P08768.1 | POLS  | 98.8%  | 38.7%  | PCSLVSHHGGYILAOCPPGDTVTVGFIH-DGPNR                                               | HCTVAHKVEFRPVGREKYRHPPEHGVELPCNRY   | THKRADQGHYVEM            |                          |   |     |
| 11             | sp | Q4QXJ7.1 | POLS  | 98.8%  | 39.7%  | PCSLVSHHGGYILAOCPPGDTVTVGFIH-DGPNR                                               | HCTVAHKVEFRPVGREKYRHPPEHGVELPCNRY   | THKRADQGHYVEM            |                          |   |     |
| 12             | sp | Q306W5.1 | POLS  | 98.8%  | 37.7%  | PCSLVSYHGGYILAOCPPGDTVTVGFIH-DGANK                                               | HMCITIAHKVEFRPVGREKYRHPPEHGVELPCN   | KYTHKRADQGHYVEM          |                          |   |     |
| 13             | sp | Q306W7.1 | POLS  | 98.8%  | 38.4%  | PCSLVSYHGGYILAOCPPGDTVTVGFIH-DGANK                                               | HMCITIAHKVEFRPVGREKYRHPPEHGVELPC    | KYTHKRADQGHYVEM          |                          |   |     |
| 14             | sp | P27284.1 | POLS  | 98.8%  | 39.7%  | PCSLVSHHGGYILAOCPPGDTVTVGFIH-DGPNR                                               | HCTVAHKVEFRPVGREKYRHPPEHGVELPCNRY   | THKRADQGHYVEM            |                          |   |     |
| 15             | sp | Q5Y388.1 | POLS  | 99.8%  | 53.7%  | VCAIRGTMGHFIVAYCPPGDELKVQFQDAESHTQ                                               | ACKVQYKHAPAPVGREKFTVRPHFGIEVPCTTY   | QLTTPTEETEDM             |                          |   |     |
| 16             | sp | Q8QZ72.1 | POLS  | 99.8%  | 55.4%  | ECTVIGTMGHFILAKCPPGERISVSFVDSKNEH                                                | RTCRIAYHHEQRLIGREFTVRPHHGIELPCTTY   | QLTTPTEETEDM             |                          |   |     |
| 17             | sp | Q80527.1 | POLS  | 99.5%  | 51.0%  | ECTVIGTMGHFIVATCPEGDSLTVAFVDKHVRH                                                | ACRIAYKHVPVLGREHFTVRPHHGIELPCTTY    | AMRTSVTTEETEM            |                          |   |     |
| 18             | sp | P27285.1 | POLS  | 99.3%  | 36.3%  | PCRRLSYKGYFLLAKCPPGDSVTVSIA-SSNS                                                 | ATSCTMARKIKPKFVGREKYDLPPVHGKKIPCT   | VYDRLKETTAGYITM          |                          |   |     |
| 19             | sp | P03316.1 | POLS  | 99.3%  | 36.6%  | PCRRLSYKGYFLLAKCPPGDSVTVSIV-SSNS                                                 | ATSCTLARKIKPKFVGREKYDLPPVHGKKIPCT   | VYDRLKETTAGYITM          |                          |   |     |
| 20             | sp | P0DOK0.1 | POLSF | 99.3%  | 36.6%  | PCRRLSYKGYFLLAKCPPGDSVTVSIV-SSNS                                                 | ATSCTLARKIKPKFVGREKYDLPPVHGKKIPCT   | VYDRLKETTAGYITM          |                          |   |     |
| 21             | sp | P17517.1 | POLS  | 99.8%  | 55.2%  | ACSIHGTMGHFIVAHCPPGDYLVKVSFEDADSH                                                | VKACKVQYKHDLPLVGREKFVVRPHFGVLPCT    | SYQLTTAPTDEETDM          |                          |   |     |
| 22             | sp | P13890.1 | POLS  | 99.8%  | 55.4%  | ACSIHGTMGHFIVAHCPPGDYLVKVSFEDANSH                                                | VKACKVQYKHDLPLVGREKFVVRPHFGVLPCT    | SYQLTTAPTDEETDM          |                          |   |     |
| 23             | sp | P08491.3 | POLS  | 99.8%  | 56.4%  | ACSIHGTMGHFIVAHCPPGDYLVKVSFEDADSH                                                | VKACKVQYKHDLPLVGREKFVVRPHFGVLPCT    | SYQLTTAPTDEETDM          |                          |   |     |
| 24             | sp | Q9JGK8.1 | POLS  | 99.8%  | 53.7%  | VCAIRGTMGHFIVAYCPPGDELKVQFQDAESHTQ                                               | ACKVQYKHAPAPVGREKFTVRPHFGIEVPCTTY   | QLTTPTEETEDM             |                          |   |     |
| 25             | sp | Q8JJX0.1 | POLS  | 99.3%  | 26.2%  | KCDVLQATGHYILANCPVGQSLTVAATLDGTR                                                 | HQCTTVFEHQVTEKFTRETSKGGHLSDMTKK     | CTRFSTTPKKSALYLD         |                          |   |     |
| 26             | sp | P03315.1 | POLS  | 99.8%  | 57.2%  | DCFVHGTMGHFILAKCPPGEFLQVSIQDTRNA                                                 | VRACRIQYHHDPPQVGREKFTIRPHYGKEIPCTTY | QQTAEETVEETDM            |                          |   |     |
| 27             | sp | P0DJZ6.1 | POLSF | 99.8%  | 57.2%  | DCFVHGTMGHFILAKCPPGEFLQVSIQDTRNA                                                 | VRACRIQYHHDPPQVGREKFTIRPHYGKEIPCTTY | QQTAEETVEETDM            |                          |   |     |
| 28             | sp | Q8QL52.1 | POLS  | 99.3%  | 25.9%  | KCDVLQATGHYILANCPVGQSLTVAATLDGTR                                                 | HQCTTVFEHQVTEKFTRETSKGGHLSDLTKK     | CTRFSTTPKKSALYLD         |                          |   |     |
| 29             | sp | P36329.1 | POLS  | 99.3%  | 33.9%  | PCHIVDGHGYFLLARCPAGDSITMEFK-KDAV                                                 | THSCSVPYEVKFNVPVGRELYTHPPEHGAEQAC   | QVYAHDAQNRGAYVEM         |                          |   |     |
| 30             | sp | P36330.1 | POLS  | 99.3%  | 33.9%  | PCHIVDGHGYFLLARCPAGDSITMEFK-KDSV                                                 | THSCSVPYEVKFNVPVGRELYTHPPEHGAEQAC   | QVYAHDAQNRGAYVEM         |                          |   |     |
| 31             | sp | P36331.1 | POLS  | 99.3%  | 35.9%  | PCHIVDGHGYFLLARCPAGDSITMEFK-KESV                                                 | THSCSVPYEVKFNVPVGRELYTHPPEHGAEQAC   | QVYAHDAQNRGAYVEM         |                          |   |     |
| 32             | sp | P36332.1 | POLS  | 99.3%  | 34.4%  | PCHIVDGHGYFLLARCPAGDSITMEFK-KGSV                                                 | THSCSVPYEVKFNVPVGRELYTHPPEHGAEQAC   | QVYAHDAQNRGAYVEM         |                          |   |     |
| 33             | sp | P05674.1 | POLS  | 99.3%  | 34.4%  | PCHIVDGHGYFLLARCPAGDSITMEFK-KDSV                                                 | RHSCSVPYEVKFNVPVGRELYTHPPEHGV       | EQACQVYAHDAQNRGAYVEM     |                          |   |     |
| 34             | sp | P09592.2 | POLS  | 99.3%  | 34.4%  | PCHIVDGHGYFLLARCPAGDSITMEFK-KDSV                                                 | THSCSVPYEVKFNVPVGRELYTHPPEHGV       | EQACQVYAHDAQNRGAYVEM     |                          |   |     |
| 35             | sp | P13897.1 | POLS  | 99.3%  | 37.1%  | PCRRLLHGKGYFLLAOCPPGDSVTVSIT-S                                                   | GASENSCTVEKKIRRFVGREYLFPPVHGKLVK    | CHVYDHLKETSAGYITM        |                          |   |     |
| consensus/100% |    |          |       |        |        | .C.hhthhGaalls.C..Gp.lp.th.....s.h..p.....hspE.....th...C..a....t.p...l..        |                                     |                          |                          |   |     |
| consensus/90%  |    |          |       |        |        | .CthhshhGaallApCP.G-.lphth.ttt..psCph.hcht...lgREha...P.aGhp.sCphY...tt.pst.lph  |                                     |                          |                          |   |     |
| consensus/80%  |    |          |       |        |        | sCplhsthGaFilApCP.G-plpsth.ttt.tpsCph.a+hc...lgRE+aph.PtaGhchsCpsYtppttspst.lph  |                                     |                          |                          |   |     |
| consensus/70%  |    |          |       |        |        | sCplhushGaFilApCPsG-oIvufp.sps.p+sCplsa+hc...lgRE+aph.PpHghElpCcssYsppstspst.l-M |                                     |                          |                          |   |     |

|   |    |          | cov   | pid    | 161    | .                                | 2                                 | .                | . | : | 240 |
|---|----|----------|-------|--------|--------|----------------------------------|-----------------------------------|------------------|---|---|-----|
| 1 | sp | Q8JUX5.3 | POLS  | 100.0% | 100.0% | HM---PPDTPDRTLLSQSGNVKKTIV-NGRTV | RYKCNCGG-SNEGLITTDKVINNCKVD-QCHA  | AVTNHKKWQYNSPLVP |   |   |     |
| 2 | sp | Q5WQY5.1 | POLS  | 100.0% | 95.3%  | HM---PPDTPDRTLLSQSGNVKKTIV-NSQT  | VRYKCNCGD-SNEGLITTDKVINNCKVD-QCHA | AVTNHKKWQYNSPLVP |   |   |     |
| 3 | sp | P0DOK1.1 | POLSF | 100.0% | 99.5%  | HM---PPDTPDRTLLSQSGNVKKTIV-NSQT  | VRYKCNCGG-SNEGLITTDKVINNCKVD-QCHA | AVTNHKKWQYNSPLVP |   |   |     |
| 4 | sp | Q5XXP3.1 | POLS  | 100.0% | 92.8%  | HM---PPDTPDRTLLSQSGNVKKTIV-NGQT  | VRYKCNCGG-SNEGLITTDKVINNCKVD-QCHA | AVTNHKKWQYNSPLVP |   |   |     |
| 5 | sp | P22056.1 | POLS  | 100.0% | 82.7%  | HM---PPDTPDRTLLSQSGNVKKTIV-DGQT  | VRYKCNCGD-SNEGLITTDKVINNCKVD-QCH  | AVTNHKKWQYNSPLVP |   |   |     |

|                |    |          |       |        |       |
|----------------|----|----------|-------|--------|-------|
| 6              | sp | 090371.1 | POLS  | 100.0% | 82.9% |
| 7              | sp | 090369.1 | POLS  | 100.0% | 82.9% |
| 8              | sp | Q86925.2 | POLS  | 99.3%  | 35.9% |
| 9              | sp | P89946.2 | POLS  | 99.3%  | 40.9% |
| 10             | sp | P08768.1 | POLS  | 98.8%  | 38.7% |
| 11             | sp | Q4QXJ7.1 | POLS  | 98.8%  | 39.7% |
| 12             | sp | Q306W5.1 | POLS  | 98.8%  | 37.7% |
| 13             | sp | Q306W7.1 | POLS  | 98.8%  | 38.4% |
| 14             | sp | P27284.1 | POLS  | 98.8%  | 39.7% |
| 15             | sp | Q5Y388.1 | POLS  | 99.8%  | 53.7% |
| 16             | sp | Q8QZ72.1 | POLS  | 99.8%  | 55.4% |
| 17             | sp | Q80S27.1 | POLS  | 99.5%  | 51.0% |
| 18             | sp | P27285.1 | POLS  | 99.3%  | 36.3% |
| 19             | sp | P03316.1 | POLS  | 99.3%  | 36.6% |
| 20             | sp | P0DOK0.1 | POLSF | 99.3%  | 36.6% |
| 21             | sp | P17517.1 | POLS  | 99.8%  | 55.2% |
| 22             | sp | P13890.1 | POLS  | 99.8%  | 55.4% |
| 23             | sp | P08491.3 | POLS  | 99.8%  | 56.4% |
| 24             | sp | Q9JGK8.1 | POLS  | 99.8%  | 53.7% |
| 25             | sp | Q8JJX0.1 | POLS  | 99.3%  | 26.2% |
| 26             | sp | P03315.1 | POLS  | 99.8%  | 57.2% |
| 27             | sp | P0DJZ6.1 | POLSF | 99.8%  | 57.2% |
| 28             | sp | Q8QL52.1 | POLS  | 99.3%  | 25.9% |
| 29             | sp | P36329.1 | POLS  | 99.3%  | 33.9% |
| 30             | sp | P36330.1 | POLS  | 99.3%  | 33.9% |
| 31             | sp | P36331.1 | POLS  | 99.3%  | 35.9% |
| 32             | sp | P36332.1 | POLS  | 99.3%  | 34.4% |
| 33             | sp | P05674.1 | POLS  | 99.3%  | 34.4% |
| 34             | sp | P09592.2 | POLS  | 99.3%  | 34.4% |
| 35             | sp | P13897.1 | POLS  | 99.3%  | 37.1% |
| consensus/100% |    |          |       |        |       |
| consensus/90%  |    |          |       |        |       |
| consensus/80%  |    |          |       |        |       |
| consensus/70%  |    |          |       |        |       |

|                                                                                  |                                         |                                |                                                             |
|----------------------------------------------------------------------------------|-----------------------------------------|--------------------------------|-------------------------------------------------------------|
| HM                                                                               | ---                                     | PPDTPDYTLMTQQAGN               | KITV-DGQTVRYKCKCDG-SNEGLITTDKVINNCKVD-CCHTAVTNHKKWQYNSPLTP  |
| HM                                                                               | ---                                     | PPDTPDYTLMTQQAGN               | KITV-DGQTVRYKCKCDG-SNEGLITTDKVINNCKVD-CCHTAVTNHKKWQYNSPLTP  |
| HR                                                                               | ---                                     | PGQQSITMLMEESGGEV              | VVQPTSGRNVITYECKCG-DFKTGTVTARTKIDGCTERKQCIAISADHVKWVFNSPLTI |
| HV                                                                               | ---                                     | PPDVPIQGLVNTGKSYSLDP           | -KTKTKYKCTCGETVKEGTATNKITLFCNDTAPKCITYAVDNTVWQYNSQYVP       |
| HQ                                                                               | ---                                     | PGLVGDSLLSIHSAKVKITV           | PSGAQVKYYCKCP--DVREGITSSDHTTCTDVKCCRAYLIDNKKWVYNSGRLP       |
| HQ                                                                               | ---                                     | PGLVADHSLLSIHSAKVKITV          | PSGAQVKYYCKCP--DVREGITSSDHTTCTDVKCCRAYLIDNKKWVYNSGRLP       |
| HQ                                                                               | ---                                     | PGLVADHSLLSSTTKVKITV           | PSGSQVKYYCKCP--DVQEGTSGDHTTCTDLKCCRAYLIDNKKWVFNSGKLP        |
| HQ                                                                               | ---                                     | PGLVADHSLSMSSTTKVKITV          | PSGSQVKYYCKCP--DVKEGTGSDYTACTDLKCCRAYLIDNKKWVYNSGKLP        |
| HQ                                                                               | ---                                     | PGLVADHSLLSIHSAKVKITV          | PSGAQVKYYCKCP--DVREGITSSDHTTCTDVKCCRAYLIGNKKWVYNSGRLP       |
| HT                                                                               | ---                                     | PPDIPDITLLSQSGNVKITA           | -GGKTIIRYNCTCGS-GNVGTTSSDKTINSCKIA-CCHAAVTNHDKWOYTSSFVP     |
| HM                                                                               | ---                                     | PPDIPDRTLLSQSGNVKITV           | -NGRTIRYSSSCGS-QAVGTTTDDKTIINSCTVD-KCQAVTSHIKWQFNSPFVP      |
| HV                                                                               | ---                                     | AHDVPDNTFLSKTGKVKITP           | -KGKSIRYNCTCGS-KESGVTKQDKEFDNCEVS-CCHTMVTAHDKWQFNSPVVP      |
| HR                                                                               | ---                                     | PGPHAYTSYLEESSGKVYAKPPSGKNITYE | CKCG-DYKTGTVTTRTEITGCTAIKOCVAYKSDQTKWVFNSPLTI               |
| HR                                                                               | ---                                     | PRPHAYTSYLEESSGKVYAKPPSGKNITYE | CKCG-DYKTGTVSTRTEITGCTAIKOCVAYKSDQTKWVFNSPLTI               |
| HR                                                                               | ---                                     | PRPHAYTSYLEESSGKVYAKPPSGKNITYE | CKCG-DYKTGTVSTRTEITGCTAIKOCVAYKSDQTKWVFNSPLTI               |
| HT                                                                               | ---                                     | PPDIPDRTLLSQTAGNVKITA          | -GGRTIRYNCTWGR-DNVGTTSTDKTINACKIID-CCHAAVTSHDKWQFTSPFVP     |
| HT                                                                               | ---                                     | PPDIPDRTLLSQTAGNVKITA          | -GGRTIRYNCTCGR-DNVGTTSTDKTINTCKIID-CCHAAVTSHDKWQFTSPFVP     |
| HT                                                                               | ---                                     | PPDIPDRTLLSQTAGNVKITA          | -GGRTIRYNCTCGR-DNVGTTSTDKTINTCKIID-CCHAAVTSHDKWQFTSPFVP     |
| HT                                                                               | ---                                     | PPDIPDITLLSQSGDNVKITA          | -GGKTIIRYNCTCGS-GNVGTTSSDKTINSCKIA-CCHAAVTNHDKWOYTSSFVP     |
| VYDAL                                                                            | PTSVEISTVVTCSDSQCTVRVPPGTTVKFDKCKNAAKE  | TVFTSDSQFTCEEPVLTAA            | SITQCKPHLRSSMLP                                             |
| HM                                                                               | ---                                     | PPDTPDRTLLSQSGNVKITV           | -GGKKVKYNCTCGT-GNVGTTNSDMTINTCLIE-CCHVSVTDHKKWQFNSPFVP      |
| HM                                                                               | ---                                     | PPDTPDRTLLSQSGNVKITV           | -GGKKVKYNCTCGT-GNVGTTNSDMTINTCLIE-CCHVSVTDHKKWQFNSPFVP      |
| VYDAL                                                                            | PTSVEISTVVTCTNERQCTVRVPPGTTVKFDKCKNAAKE | TVFTSDSQFTCEEPVLTAA            | SITQCKPHLRSSMLP                                             |
| HL                                                                               | ---                                     | PGSEVDSSLVSLSGSSVTVP           | PAGTSALVECECGGTKISETINTAKQFSQCTKKECCRAYRLQNDKWVYNSDKLP      |
| HL                                                                               | ---                                     | PGSEVDSSLVSLSGSSVTVP           | PAGTSALVECECGGTTISKTIKNTKQFSQCTKKECCRAYRLQNDKWVYNSDKLP      |
| HL                                                                               | ---                                     | PGSEVDSTLLSTSGSSVHTVP          | PAGQSVLVECECGGTKISETINSAKQYSQCSKTACCRAYRTQNDKWVYNSDKLP      |
| HL                                                                               | ---                                     | PGSEVDSSLVSLSGSSVTVP           | PPVGTSALVKCKCGGTKISETINKAKQFSQCTKKECCRAYRLQNDKWVYNSDKLP     |
| HL                                                                               | ---                                     | PGSEVDSSLVSLSGSSVTVP           | PPDGTALVECECGGTKISETINKTKQFSQCTKKECCRAYRLQNDKWVYNSDKLP      |
| HL                                                                               | ---                                     | PGSEVDSSLVSLSGSSVTVP           | PPVGTSALVECECGGTKISETINKTKQFSQCTKKECCRAYRLQNDKWVYNSDKLP     |
| HR                                                                               | ---                                     | PGPHAYKSYLEEASGEVYIKPPSGKNITYE | CKCG-DYSTGIVSTRKMNCGTKAKCCIAAYKSDQTKWVFNSPLTI               |
| h....s.....hhp.ttt.h.hps..stphhh.pph.....thh.tt.....s.....h.s...tp...hpS..h.     |                                         |                                |                                                             |
| H....P...s...ohhp.puspvhlp.sgpphhh.CpCs.....thhsptp.hstCp...pChshh.pppKW.asSs.l. |                                         |                                |                                                             |
| Hh...Psshs.pollo.puupvpplss.sgpslpapCpCs..t..thsssp.hstCp...CCpAhhsppKW.aNsshlp  |                                         |                                |                                                             |
| Hh...PsshsDpo.lloppuupvpplts.sgpslpCpCut.t.ptshsoscphssCpht.CC+AhhsppKW.aNsshlp  |                                         |                                |                                                             |

|    |    |          | cov   | pid    | 241    | :              | .  | .      | .                                         | .                                                | 3                       | .        | 320                |
|----|----|----------|-------|--------|--------|----------------|----|--------|-------------------------------------------|--------------------------------------------------|-------------------------|----------|--------------------|
| 1  | sp | Q8JUX5.3 | POLS  | 100.0% | 100.0% | RNAELGDRKGKIHI | PF | PLANVT | CMVPKARNPTV                               | YTGKNQVIMLLYP                                    | PDHPTLLSYRSMGEE         | FN       | YQEEWVTHKKEVVLTVPT |
| 2  | sp | Q5WQY5.1 | POLS  | 100.0% | 95.3%  | RNVELGDRKGKIHI | PF | PLANVT | CRGPKARNPTV                               | YTGKNQVIMLLYP                                    | PDHPTLLSYRNMGEE         | FN       | YQEEWVTHKKEVRLTVPT |
| 3  | sp | P0DOK1.1 | POLSF | 100.0% | 99.5%  | RNAELGDRKGKIHI | PF | PLANVT | CMVPKARNPTV                               | YTGKNQVIMLLYP                                    | PDHPTLLSYRSMGEE         | FN       | YQEEWVTHKKEVVLTVPT |
| 4  | sp | Q5XXP3.1 | POLS  | 100.0% | 92.8%  | RNAELGDRKGKIHI | PF | PLANVT | CRVPKARNPTV                               | YTGKNQVIMLLYP                                    | PDHPTLLSYRNMGEE         | FN       | YHEEWVTHKKEVTLTVPT |
| 5  | sp | P22056.1 | POLS  | 100.0% | 82.7%  | RNSEQGRKGKIHI  | PF | LVNTT  | CRVPKARNPTV                               | YTGKNRVTL                                        | LLHPDHPTLLSYRAMGRIP     | DYHEEWIT | TKKEISITVPA        |
| 6  | sp | 090371.1 | POLS  | 100.0% | 82.9%  | RNSEQGRKGKIHI  | PF | LVNTT  | CRVPKARNPTV                               | YTGKNRVTL                                        | LLYPDHPTLLSYRAMGRIP     | DYHEEWIT | SKKEISITVPA        |
| 7  | sp | 090369.1 | POLS  | 100.0% | 82.9%  | RNSEQGRKGKIHI  | PF | LVNTT  | CRVPKARNPTV                               | YTGKNRVTL                                        | LLYPDHPTLLSYRSMGRIP     | DYHEEWIT | SKKEISITVPA        |
| 8  | sp | Q86925.2 | POLS  | 99.3%  | 35.9%  | R-HTDHTAQQKLH  | IP | F      | LQQAQCTVPLAHL                             | PGVKHAYRSMSTLTHAEHPTLLTTRHL                      | GENPQPTAEWIVGSVTRNFSITI |          |                    |
| 9  | sp | P89946.2 | POLS  | 99.3%  | 40.9%  | R-SEVTEVKGKIH  | VP | FL     | TDSTCAVSVAPEQVYRLGEVEFHFPMPYPTLFSIRSLGKDP | SHSQEWIDTPMSKTIQVGA                              |                         |          |                    |
| 10 | sp | P08768.1 | POLS  | 98.8%  | 38.7%  | R-GEGDTFKGKLH  | VP | F      | VPVKAKCIATLAPEL                           | VEHKHRTLILHLHPDHPTLLTTRSLSGDANPTRQWIERPTTVNFTVTG |                         |          |                    |
| 11 | sp | Q4QXJ7.1 | POLS  | 98.8%  | 39.7%  | R-GEGDTFKGKLH  | VP | F      | VPVKAKCIATLAPEL                           | VEHKHRTLILHLHPDHPTLLTTRSLSGDANPTRQWIERPTTVNFTVTG |                         |          |                    |



R-GEGETFGKGLHVPFVPVTSKCTATLAPEPLVEHKHRSLLHLHPEHPTLLTTRALGNDARPTRQWIDQPTTNFTVTG  
R-GEGETFGKGLHVPFVPVTSKCTATLAPEPLVEHKHRSVLHLHPEHPTLLTTRALGNSNARPTRQWIEQPTTNFTVTG  
R-GEGETFGKGLHVPFVPVTSKCTATLAPEPLVEHKHRTLLHLHPEHPTLLTTRALGSDANPTROWIERPTTNFTVTG  
R-ADQLSRKGVHVPFPLTNSICRVPLARAPGVTYGKRELTVKLHPDHTLLTYRSLGADPRPYEEWIDRYVERTIPVTE  
R-RMQAERKGVHVPFPLTNSICRVPLARAPGVTYGKRELTVKLHPDHTLLTYRSLGADPRPYEEWIDRYVERTIPVTE  
R--AGSGKKGKTHVPFPLSNSICRVPLARAPGVTYGKRELTVKLHPDHTLLTYRSLGADPRPYEEWIDRYVERTIPVTE  
R-HADHTAQGKLHLPFKLIPSTCMVPVAHAPNVIHGFKHISLQLDTHLTLTTRRLGANPEPTTEWIVGKTVRNFTVDR  
R-HDDHTAQGKLHLPFKLIPSTCMVPVAHAPNVIHGFKHISLQLDTHLTLTTRRLGANPEPTTEWIVGKTVRNFTVDR  
R-HDDHTAQGKLHLPFKLIPSTCMVPVAHAPNVIHGFKHISLQLDTHLTLTTRRLGANPEPTTEWIVGKTVRNFTVDR  
R-ADQARKGVHVPFPLTNSICRVPLARAPGVTYGKRELTVKLHPDHTLLTYRSLGADPRPYEEWIDRYVERTIPVTE  
R-ADQARKGVHVPFPLTNSICRVPLARAPGVTYGKRELTVKLHPDHTLLTYRSLGADPRPYEEWIDRYVERTIPVTE  
R-ADQARKGVHVPFPLTNSICRVPLARAPGVTYGKRELTVKLHPDHTLLTYRSLGADPRPYEEWIDRYVERTIPVTE  
R-ADQARKGVHVPFPLTNSICRVPLARAPGVTYGKRELTVKLHPDHTLLTYRSLGADPRPYEEWIDRYVERTIPVTE  
R-ADQARKGVHVPFPLTNSICRVPLARAPGVTYGKRELTVKLHPDHTLLTYRSLGADPRPYEEWIDRYVERTIPVTE  
S--GGKEVKARIPFPFPPEATICRVSVAPLPSITYEESDVLLAGTAKYPVLLTTRNLGFHNSATSEWIQGKYLRRIPTVP  
R-ADEPARKGVHVPFPLDNIICRVPMAREPTVIHGKRELTVKLHPDHTLLTYRSLGADPRPYEEWIDRYVERTIPVTE  
R-ADEPARKGVHVPFPLDNIICRVPMAREPTVIHGKRELTVKLHPDHTLLTYRSLGADPRPYEEWIDRYVERTIPVTE  
S--GGKEVKARIPFPFPPEATICRVSVAPLPSITYEESDVLLAGTAKYPVLLTTRNLGFHNSATSEWIQGKYLRRIPTVP  
K-AAGATLKGKGLHVPFLLADGKCTVPLAPEPMITFGFRSVSLKLHPKNPYTLTTRQLADEPHYTHELISEPVVRNFSVTE  
K-AAGATLKGKGLHVPFLLADGKCTVPLAPEPMITFGFRSVSLKLHPKNPYTLTTRQLADEPHYTHELISEPVVRNFSVTE  
K-AAGATLKGKGLHVPFLLADGKCTVPLAPEPMITFGFRSVSLKLHPKNPYTLTTRQLADEPHYTHELISEPVVRNFSVTE  
K-AAGATLKGKGLHVPFLLADGKCTVPLAPEPMITFGFRSVSLKLHPKNPYTLTTRQLADEPHYTHELISEPVVRNFSVTE  
K-AAGATLKGKGLHVPFLLADGKCTVPLAPEPMITFGFRSVSLKLHPKNPYTLTTRQLADEPHYTHELISEPVVRNFSVTE  
K-AAGATLKGKGLHVPFLLADGKCTVPLAPEPMITFGFRSVSLKLHPKNPYTLTTRQLADEPHYTHELISEPVVRNFSVTE  
K-AAGATLKGKGLHVPFLLADGKCTVPLAPEPMITFGFRSVSLKLHPKNPYTLTTRQLADEPHYTHELISEPVVRNFSVTE  
K-AAGATLKGKGLHVPFLLADGKCTVPLAPEPMITFGFRSVSLKLHPKNPYTLTTRQLADEPHYTHELISEPVVRNFSVTE  
R-HTDHSVQGLHVPFLLADGKCTVPLAPEPMITFGFRSVSLKLHPKNPYTLTTRQLADEPHYTHELISEPVVRNFSVTE  
p.....hpu+1.hPF.....C.sshA.s.h.....tth.h.h.s.....s.h.hRths.....tph1.t...h.h.ls.  
+.t...thpGKGLHVPF.....spChsshA..P..l.athpp1.h.Lhsp.PthhohRthut.sp..pph1.t...h.h.sVs.  
+.ttttshKGKGLHVPF.LssspChVshA.tp..lpathpp1.LtLaPcapTLLohRphtGtpsp.ppEWlst.h.hshsvst  
R.uttshKGKGLHVPF.LssspCpVPla.tPhVpauhpp1sLpLaPc+P.TLLohRpLgtcPp.pceWisp.s.hshsvst

4 400

EGLEVTWGNNEPYKYWPQL-SANGTAHGHPHEIILYYE LYPTMTVVVVSVASFILLS MVGMAVGMCMCA RRRRCITPYEL

EGLEVTWGNNEPYKYWPQL-STNGTAHGHPHEIILYYE LYPTMTVVVVSVASFVLLS MVGVAVGMCMCA RRRRCITPYEL

EGLEVTWGNNEPYKYWPQL-SANGTAHGHPHEIILYYE LYPTMTVVVVSVASFILLS MVGMAVGMCMCA RRRRCITPYEL

EGLEVTWGNNEPYKYWPQM-STNGTAHGHPHEIILYYE LYPTMTVVIIVSVASFVLLS MVGTAVGMCMCA RRRRCITPYEL

EGLEVTWGNNDPYKYWPQL-STNGTAHGHPHEIILYYE LYPTTTIAVLAAASIVITSLVGLSLGMCICARRRCITPYEL

EGLEVTWGNNDPYKYWPQL-STNGTAHGHPHEIILYYE LYPTTTIAVLAAASIVVASLVGLSLGMCICARRRCITPYEL

EGLEVTWGNNDPYKYWPQL-STNGTAHGHPHEIILYYE LYPTTTIAVLAAASIVVASLVSLSLGMCICARRRCITPYEL

QGF EYTWGNQKPVRYVAQE-SAPGNPHGWPHETVRHYHLYPFYTVT VLSGMGLAICAGLVISILCCCKARRDCLTPYQL

EGVEYVWGNNNPVRLWAQK-SSSSAHGNPISIVSHYYDLYPYWTITVLASLGLLIVISSGFSCFLCSVARTKCLTPYQL

EGLEYTWGNHPPKRVWAQE-SGEGNPHGWPHVVVVYYNRYPLTTIIGLCTCVAIIMVSCDHPCGSFSGLRNLCITPYKL

EGLEYTWGNHPPKRVWAQE-SGEGNPHGWPHVVVVYYNRYPLTTIIGLCTCVAIIMVSCVTSVWLLCRTNLCITPYKL

EGFEYTWGNHPPKRVWAQE-SGEGNPHGWPHVVIIYYNRYPMTTIVGLCTCAAIIMVSCITSVWLLCRTNLCITPYRL

EGFEYTWGNHPPKRVWAQE-SGEGNPHGWPHETVVIYYNRYPMTTIVGLCTCVAIIMVSCVTSVWLLCRTNLCITPYRL

EGLEYTWGNHPPKRVWAQE-SGEGNPHGWPHVVVVYYNRYPLTTIIGLCTCVAIIMVSCVHPCGSFAGLRNLCITPYKL

DGIEYVRAGNNPPVRLWAQL-TTEGKPHGWPHETIILYYGLYPAATIAAVSAAGLAVVLSLLASCYMFATARRKCLTPYAL

EGVEYQWGNHKKPQRFVVAL-TTEGKAHGWPHETIEIYYGLHPTTTIVVIVRVSVVVLLSFAASVYMCVVARTKCLTPYAL

EGLEYTWGNHAPVRLWAQL-TTKGSAHGMPHETFSYYGYLPATTVAVCVGLACVILLALSASCCLCVSARNKCLTPYAL

|                |    |          |       |       |       |
|----------------|----|----------|-------|-------|-------|
| 18             | sp | P27285.1 | POLS  | 99.3% | 36.3% |
| 19             | sp | P03316.1 | POLS  | 99.3% | 36.6% |
| 20             | sp | P0DOK0.1 | POLSF | 99.3% | 36.6% |
| 21             | sp | P17517.1 | POLS  | 99.8% | 55.2% |
| 22             | sp | P13890.1 | POLS  | 99.8% | 55.4% |
| 23             | sp | P08491.3 | POLS  | 99.8% | 56.4% |
| 24             | sp | Q9JGK8.1 | POLS  | 99.8% | 53.7% |
| 25             | sp | Q8JJX0.1 | POLS  | 99.3% | 26.2% |
| 26             | sp | P03315.1 | POLS  | 99.8% | 57.2% |
| 27             | sp | P0DJZ6.1 | POLSF | 99.8% | 57.2% |
| 28             | sp | Q8QL52.1 | POLS  | 99.3% | 25.9% |
| 29             | sp | P36329.1 | POLS  | 99.3% | 33.9% |
| 30             | sp | P36330.1 | POLS  | 99.3% | 33.9% |
| 31             | sp | P36331.1 | POLS  | 99.3% | 35.9% |
| 32             | sp | P36332.1 | POLS  | 99.3% | 34.4% |
| 33             | sp | P05674.1 | POLS  | 99.3% | 34.4% |
| 34             | sp | P09592.2 | POLS  | 99.3% | 34.4% |
| 35             | sp | P13897.1 | POLS  | 99.3% | 37.1% |
| consensus/100% |    |          |       |       |       |
| consensus/90%  |    |          |       |       |       |
| consensus/80%  |    |          |       |       |       |
| consensus/70%  |    |          |       |       |       |

DGL EY I W G N H E P V R V Y A Q E - S A P G D P H G W P H E I V Q H Y Y H R H P V Y T I L A V A S A A V A M M I G V T V A A L C A C K A R R E C L T P Y A L  
 DGL EY I W G N H E P V R V Y A Q E - S A P G D P H G W P H E I V Q H Y Y H R H P V Y T I L A V A S A T V A M M I G V T V A V L C A C K A R R E C L T P Y A L  
 DGL EY I W G N H E P V R V Y A Q E - S A P G D P H G W P H E I V Q H Y Y H R H P V Y T I L A V A S A T V A M M I G V T V A V L C A C K A R R E C L T P Y A L  
 E G X E Y Q W G N N P P V R L W A X L - T T E G K P H G W P H E I I Q Y Y Y G L Y P A A T I A A V S G X S L M A L L T L A A T C C M L A T A R R K C L T P Y A L  
 E G I E Y Q W G N N P P V R L W A Q L - T T E G K P H G W P H E I I Q Y Y Y G L Y P A A T I A A V S G A S L M A L L T L A A T C C M L A T A R R K C L T P Y A L  
 E G I E Y Q W G N N P P V R L W A Q L - T T E G K P H G W P H E I I Q Y Y Y G L Y P A A T I A A V S G A S L M A L L T L A A T C C M L A T A R R K C L T P Y A L  
 D G I E Y R W G N N P P V R L W A Q L - T T E G K P H G W P H E I I L Y Y Y G L Y P A A T I A A V S A A G L A V V L S L L A S C Y M F A T A R R K C L T P Y A L  
 Q G I E L T W G N N A P M H F W S S V R Y A S G D A D A Y P W E L L V Y H T K H H P E Y A W A F V G V A C G L L A I A A C M F A C A C S R V R Y S L V A N T F N  
 D G M E Y H W G N N D P V R L W S Q L - T T E G K P H G W P H E I V Q Y Y Y G L Y P A A T V S A V V G M S L L A L I S I F A S C Y M L V A A R S K C L T P Y A L  
 D G M E Y H W G N N D P V R L W S Q L - T T E G K P H G W P H E I V Q Y Y Y G L Y P A A T V S A V V G M S L L A L I S I F A S C Y M L V A A R S K C L T P Y A L  
 Q G I E L M L G N N A P L H F W S S V R Y A S G D A D A Y P W E L L V H H I K H H P E Y A W A F V G V A C G L L A V A A C M F A C A C N R V R Y S L L A N T F N  
 K G W E F V W G N H P P K R F W A Q E - T A P G N P H G L P H E V I T H Y Y H R Y P M S T I L G L S I C A A I V T V S I A A S T W L L C K S R V S C L T P Y R L  
 K G W E F V W G N H P P K R F W A Q E - T A P G N P H G L P H E V I T H Y Y H R Y P M S T I T G L S I C A A I V A V S I A A S T W L L C R S R A S C L T P Y R L  
 K G W E F V W G N H P P Q R Y W S Q E - T A P G N P H G L P H E V I T H Y Y H R Y P M S T I L G L S I C A A I V T T S I A A S V W L F C K S R I S C L T P Y R L  
 K G W E F V W G N H P P K R F W A Q E - T A P G N P H G L P H E V I T H Y Y H R Y P M S T I L G L S I C A A I V T V S I A A S T W L F C K S R V S C L T P Y R L  
 K G W E F V W G N H P P K R F W A Q E - T A P G N P H G L P H E V I T H Y Y H R Y P M S T I L G L S I C A A I A T V S I A A S T W L F C R S R V A C L T P Y R L  
 K G W E F V W G N H P P K R F W A Q E - T A P G N P H G L P H E V I T H Y Y H R Y P M S T I L G L S I C A A I A T V S I A A S T W L F C R S R V A C L T P Y R L  
 E G L E Y V W G N H E P V R V W A Q E - S A P G D P H G W P H E I I H Y Y H R H P V Y T V I V L C G V A L A I L V G T A S S A A C I A K A R R D C L T P Y A L  
 pG.Eh.hGnp.P.+hhs....s.upscu.Ph.lh.aahthaP..sh.hh...shhhh.....hh.h...R..hlssh..  
 cGhEh.WGnp.Ph+hasp..os.GpsHGhPhp1l.aYythPhh.Tlhs1s.hshhhh..hhhshhhh.tsR..ClTPYtL  
 cGhEhHhGnp.Ph+hhsQ..os.GpsHGhPhE1l.aYythPhhTlhs1sssshhhhhshshushhshspurtpClTPYtL  
 -GhEahhGnpshRhuQ..os.GssHGhPhE1l.aYythPhhTlhs1ussuh1lhlulshushhshspurppClTPYtL

|    |    |          | cov   | pid    | 401    | .                | ] 415 |
|----|----|----------|-------|--------|--------|------------------|-------|
| 1  | sp | Q8JUX5.3 | POLS  | 100.0% | 100.0% | TPGATVPFLLSLICC  |       |
| 2  | sp | Q5WQY5.1 | POLS  | 100.0% | 95.3%  | TPGATVPFLLSLICC  |       |
| 3  | sp | P0DOK1.1 | POLSF | 100.0% | 99.5%  | TPGATVPFLLSLICC  |       |
| 4  | sp | Q5XXP3.1 | POLS  | 100.0% | 92.8%  | TPGATVPFLLSLICC  |       |
| 5  | sp | P22056.1 | POLS  | 100.0% | 82.7%  | TPGATVPFLLGVLCC  |       |
| 6  | sp | 090371.1 | POLS  | 100.0% | 82.9%  | TPGATVPFLLGILCC  |       |
| 7  | sp | 090369.1 | POLS  | 100.0% | 82.9%  | TPGATVPFLLGVLCC  |       |
| 8  | sp | Q86925.2 | POLS  | 99.3%  | 35.9%  | APNAVVPFLVTLCC   |       |
| 9  | sp | P89946.2 | POLS  | 99.3%  | 40.9%  | APGAQLPTFIALCC   |       |
| 10 | sp | P08768.1 | POLS  | 98.8%  | 38.7%  | APNAQVPIILLALLCC |       |
| 11 | sp | Q4QXJ7.1 | POLS  | 98.8%  | 39.7%  | APNAQVPIILLALLCC |       |
| 12 | sp | Q306W5.1 | POLS  | 98.8%  | 37.7%  | APNAQVPIILLAVLCC |       |
| 13 | sp | Q306W7.1 | POLS  | 98.8%  | 38.4%  | APNAQVPIILLAVLCC |       |
| 14 | sp | P27284.1 | POLS  | 98.8%  | 39.7%  | APNAQVPIILLALLCC |       |
| 15 | sp | Q5Y388.1 | POLS  | 99.8%  | 53.7%  | TPGAVVPVTLGVLCC  |       |
| 16 | sp | Q8QZ72.1 | POLS  | 99.8%  | 55.4%  | TPGAVVPVTIGVLCC  |       |
| 17 | sp | Q80527.1 | POLS  | 99.5%  | 51.0%  | TPGAVVPCTLSLLCC  |       |
| 18 | sp | P27285.1 | POLS  | 99.3%  | 36.3%  | APNAVIPTSLALLCC  |       |
| 19 | sp | P03316.1 | POLS  | 99.3%  | 36.6%  | APNAVIPTSLALLCC  |       |
| 20 | sp | P0DOK0.1 | POLSF | 99.3%  | 36.6%  | APNAVIPTSLALLCC  |       |
| 21 | sp | P17517.1 | POLS  | 99.8%  | 55.2%  | TPGAVVPLTLGLXXC  |       |
| 22 | sp | P13890.1 | POLS  | 99.8%  | 55.4%  | TPGAVVPLTLGLLXC  |       |
| 23 | sp | P08491.3 | POLS  | 99.8%  | 56.4%  | TPGAVVPLTLGLLCC  |       |

|                |    |          |       |       |       |   |   |   |   |   |   |   |   |   |   |   |   |   |   |
|----------------|----|----------|-------|-------|-------|---|---|---|---|---|---|---|---|---|---|---|---|---|---|
| 24             | sp | Q9JGK8.1 | POLS  | 99.8% | 53.7% | T | P | G | A | V | P | V | T | L | G | V | L | C | C |
| 25             | sp | Q8JJX0.1 | POLS  | 99.3% | 26.2% | S | N | P | P | P | L | T | A | L | T | A | A | L | C |
| 26             | sp | P03315.1 | POLS  | 99.8% | 57.2% | T | P | G | A | A | V | P | W | T | L | G | I | L | C |
| 27             | sp | P0DJZ6.1 | POLSF | 99.8% | 57.2% | T | P | G | A | A | V | P | W | T | L | G | I | L | C |
| 28             | sp | Q8QL52.1 | POLS  | 99.3% | 25.9% | P | N | P | P | P | L | T | A | L | T | A | A | L | C |
| 29             | sp | P36329.1 | POLS  | 99.3% | 33.9% | T | P | N | A | R | M | P | L | C | L | A | V | L | C |
| 30             | sp | P36330.1 | POLS  | 99.3% | 33.9% | T | P | N | A | K | M | P | L | C | L | A | V | L | C |
| 31             | sp | P36331.1 | POLS  | 99.3% | 35.9% | T | P | N | A | R | M | P | L | C | L | A | V | L | C |
| 32             | sp | P36332.1 | POLS  | 99.3% | 34.4% | T | P | N | A | R | M | P | L | C | L | A | V | L | C |
| 33             | sp | P05674.1 | POLS  | 99.3% | 34.4% | T | P | N | A | R | I | P | F | C | L | A | V | L | C |
| 34             | sp | P09592.2 | POLS  | 99.3% | 34.4% | T | P | N | A | R | I | P | F | C | L | A | V | L | C |
| 35             | sp | P13897.1 | POLS  | 99.3% | 37.1% | A | P | N | A | T | V | P | T | A | L | A | V | L | C |
| consensus/100% |    |          |       |       |       | s | s | s | s | . | h | s | h | . | h | s | h | . | C |
| consensus/90%  |    |          |       |       |       | s | P | s | A | . | h | P | h | h | L | u | L | L | C |
| consensus/80%  |    |          |       |       |       | s | P | s | A | . | L | P | h | h | L | u | L | L | C |
| consensus/70%  |    |          |       |       |       | s | P | s | A | . | h | L | P | h | h | L | u | L | C |

[MView](#) 1.63, Copyright © 1997-2018 [Nigel P. Brown](#)
