# Supplementary material for: Chikungunya Virus Diagnosis: A Review of Current Antigen Detection Methods
Source: MDPI journal article supplement (doi:10.3390/tropicalmed8070365), 2023-07-17
Supplement: s1 [file s1]

Reference sequence (1): sp|Q8JUX5.3|POLs  
Identities normalised by aligned length.  
Colored by: identity

|    |    |                | cov  | pid    | 1      | 80                                                                               |
|----|----|----------------|------|--------|--------|----------------------------------------------------------------------------------|
| 1  | sp | Q8JUX5.3       | POLs | 100.0% | 100.0% | RTAKAAT-YQEAAYVLWNEQQPLFWLQALIPLAALIVLNCCLRLPPCCCKTLA-----FLAVMSIGAHTVSAYEHVTVI  |
| 2  | sp | Q5WQY5.1       | POLs | 100.0% | 96.8%  | RTAKAAT-YQEAAYVLWNEQQPLFWLQALIPLAALIVLNCCLRLPPCCCKTLT-----FLAVMSVGAHTVSAYEHVTVI  |
| 3  | sp | Q5XXP3.1       | POLs | 100.0% | 96.4%  | RTTKAAT-YYEAAAYVLWNEQQPLFWLQALIPLAALIVLNCCLKLLPCCCKTLA-----FLAVMSIGAHTVSAYEHVTVI |
| 4  | sp | P22056.1       | POLs | 100.0% | 87.3%  | RTAKAAS-YYEAAATYLWNEQQPLFWLQLLIPLSAATVVCNCKLLPCCCKTLT-----FLAVMSIGARTVTAYEHATVI  |
| 5  | sp | 090371.1       | POLs | 100.0% | 88.1%  | KTAKAAS-YYEAAATYLWNEQQPLFWLQLLIPLSAATVVCNCKLLPCCCKTLT-----FLAVMSIGARTVSAYEHATVI  |
| 6  | sp | 090369.1       | POLs | 100.0% | 87.9%  | KTAKAAS-YYEAAATYLWNEQQPLFWLQLLIPLSAATVACNCKLLPCCCKTLT-----FLAVMSIGARTVSAYEHATVI  |
| 7  | sp | Q86925.2       | POLs | 98.4%  | 44.6%  | QRTSADE-FTDTMGYLWQHSQTMFWIQLVIPLAAVITLVR---CCSCCLP-----FLLVASP-PNKADAYEHTITV     |
| 8  | sp | P89946.2       | POLs | 99.4%  | 50.7%  | KSARADT-LDD-FSYLWTNNQAMFWLQLASPVAAFCLLSYCGRLACCMKI-----FLGISGLCVIATQAYEHSITM     |
| 9  | sp | P08768.1       | POLs | 99.0%  | 47.7%  | KPTRADD-TLQVLNLYWNNNQNFWMQTLIPLAALIVCMRMLAALFCCGPA-----FLLVCGAW---AAAYEHTAVM     |
| 10 | sp | Q4QXJ7.1       | POLs | 99.2%  | 49.9%  | KPTRADD-TLQVLNLYWNNNQNFWMQTLIPLAALIVCMRMLRCLFCCGPA-----FLLVCGALG---AAAYEHTAVM    |
| 11 | sp | Q306W5.1       | POLs | 99.2%  | 48.9%  | KPTRADD-TLQVLNLYWNNNQNFWMQTLIPLAALIVCMRMLRCLLCCGPA-----FLLVCGALG---AAAYEHTAVM    |
| 12 | sp | Q306W7.1       | POLs | 99.2%  | 49.5%  | KPTRADD-TLQVLNLYWNNNQNFWMQTLIPLAALIVCMRMLRCLLCCGPA-----FLLVCGALG---AAAYEHAAM     |
| 13 | sp | P27284.1       | POLs | 99.0%  | 48.1%  | KPTRADD-TLQVLNLYWNNNQNFWMQTLIPLAALIVCMRIVRCLFCCGPA-----FLLVCGAW---AAAYEHTAVM     |
| 14 | sp | Q5Y388.1       | POLs | 99.8%  | 59.5%  | PRAHAAS-FAESMAYLWDENQTLFWLELATPLAAITILVCCLKNLLCCCKPLS-----FLVLVSLGTPVVKSYEHTATI  |
| 15 | sp | Q8QZ72.1       | POLs | 99.2%  | 58.1%  | PKAHAAS-FAEGMAYLWNNQSMFWELTGPLALLILATCCARSLLSCCKG-S-----FLVAMSIGSAVASAYEHTATI    |
| 16 | sp | Q80527.1       | POLs | 100.0% | 57.4%  | PRAKAAT-FAETAAAYLWAEHQTVFWMQFAIPVACFMIVTYCLRHLMLCCRTAS-----FLVAVSLGMGATQAYEHSVTL |
| 17 | sp | P27285.1       | POLs | 98.8%  | 45.7%  | RSANAET-FTETMSYFWSNSQPFWMQLCIPLAAVIVLMR---CCSCCLP-----FLVVAGAYLAKVDAYEHATTV      |
| 18 | sp | P03316.1       | POLs | 98.8%  | 45.7%  | RSANAET-FTETMSYFWSNSQPFWMQLCIPLAAVIVLMR---CCSCCLP-----FLVVAGAYLAKVDAYEHATTV      |
| 19 | sp | P13890.1       | POLs | 99.6%  | 57.3%  | PRANAAS-FAETMAYLWDENKTLFWMEXXXXXALALLACCICKSLICCCKPFS-----FLVLLSLG-ASAKAYEHTATI  |
| 20 | sp | P08491.3       | POLs | 99.6%  | 58.3%  | PRANAAS-FAETMAYLWDENKTLFWMEFAAPAAALALLACCICKSLICCCKPFS-----FLVLLSLG-ASAKAYEHTATI |
| 21 | sp | Q9JGK8.1       | POLs | 99.8%  | 58.7%  | PRAHAAS-FAESMAYLWDENQTLFWLELATPLAAITILVCCLKNLLCCCKPLS-----FLVLVSLGTPVVKSYEHTATI  |
| 22 | sp | Q8JJX0.1       | POLs | 99.8%  | 33.6%  | PGARADQPYLDIIAYLWTSKVAFLQFAAPVACVLIITYALRHCRLLCKSFLGVRGWSALLVILAYVQSCKSYEHTVV    |
| 23 | sp | P03315.1       | POLs | 99.6%  | 59.3%  | PRAHAAS-VAETMAYLWQDQNALFWLEFAAPVACILIITYCLRNVLLCCCKSLS-----FLVLLSLG-ATARAYEHSTM  |
| 24 | sp | Q8QL52.1       | POLs | 100.0% | 33.8%  | PGARADQPYLDIIAYLWTSKVAFLQCAAPVACMLIVTYALRHCRLLCKNSFLGVRGWSALLVILAYVQSCKAYEHTVV   |
| 25 | sp | P36329.1       | POLs | 99.0%  | 49.8%  | RTARAET-TWESLDHLWNNNQMFWMQLLIPLAALIVVTRLLRCVCCVVP-----FLVVAGAAG--AGAYEHATTM      |
| 26 | sp | P36330.1       | POLs | 99.0%  | 48.8%  | RSARAET-TWESLDHLWNNNQMFWMQLLIPLAALIVVTRLLRCMCCVVP-----FLVVAGAAG--AGAYEHATTM      |
| 27 | sp | P36331.1       | POLs | 99.0%  | 50.0%  | RTARAET-TWESLDHLWNNNQMFWSQLLIPLAALIVATRLKCVCCVVP-----FLVVAGAVG--AGAYEHATTM       |
| 28 | sp | P36332.1       | POLs | 99.0%  | 49.4%  | RTARAET-TWESLDHLWNNNQMFWMQLLIPLAALIVVTRLLRCVCCVVP-----FLVVAGAAG--AGAYEHATTM      |
| 29 | sp | P05674.1       | POLs | 98.8%  | 49.2%  | RTARAET-TWESLDHLWNNNQMFWMQLLIPLAALIVVTRLLRCVCCVVP-----FLVMAGAA--APAYEHATTM       |
| 30 | sp | P09592.2       | POLs | 98.8%  | 49.2%  | RTARAET-TWESLDHLWNNNQMFWMQLLIPLAALIVVTRLLRCVCCVVP-----FLVMAGAA--AGAYEHATTM       |
| 31 | sp | P13897.1       | POLs | 98.8%  | 42.8%  | RPTNAET-FGETLNHLWFNNQPLFWLQALCIPLAALVILFR---CFSCCMP-----FLLVAGVCLGKVDAFEHATTV    |
|    |    | consensus/100% |      |        |        | ..spAtp.h.p.hsahw.ppp.hhh.p.....hhhhh.....h.sh.....h.hh.....s.uaEHshhh           |
|    |    | consensus/90%  |      |        |        | ..spAtp.hhpshsaLwsppp.hfWhphhhPlushllhh.....h.ssh.....FLhhhuhh...stAYEHsssh      |
|    |    | consensus/80%  |      |        |        | .ts+Ats.hh-shsaLwspsQshfWhqhhhhPLAAhllhhphl+th.CCs.....FLh1huhh...stAYEHsssh     |
|    |    | consensus/70%  |      |        |        | psA+Aso.hhEshsYLwspsQshfWhqhhIPLAAltl1sphL+s1.CCs.....FLl1huhhh..ssAYEHsssh      |
|    |    | cov            | pid  | 81     | 1      | 160                                                                              |
| 1  | sp | Q8JUX5.3       | POLs | 100.0% | 100.0% | PNTVGVP-YKTLVNRPGYSPMVLLENELLSVTLEPTLSLDYITGEYKTVIPSPYVKCCGTAE-----KDKNLPDY      |
| 2  | sp | Q5WQY5.1       | POLs | 100.0% | 96.8%  | PNTVGVP-YKTLVNRPGYSPMVLLENELLSVTLEPTLSLDYITGEYKTVIPSPYVKCLRYSEC-----KDKSLPDY     |
| 3  | sp | Q5XXP3.1       | POLs | 100.0% | 96.4%  | PNTVGVP-YKTLVNRPGYSPMVLLENELLSVTLEPTLSLDYITGEYKTVIPSPYVKCCGTAE-----KDKSLPDY      |

PNTVGVP-CKT LVS RPYGYS PMVL EME LQSV TLE PALS LDYIT CEYKTITPSPYVKCCGTAEC-----KAKNLPDY  
 PNTVGVP-YKT LVS RPYGYS PMVL EME LQSV TLE PTLFLDYIT CEYKTITPSPYVKCCGTAEC-----KAKNLPDY  
 PNTVGVP-YKT LVS RPYGYS PMVL EME LQSV TLE PTLFLDYIT CEYKTITPSPYVKCCGTAEC-----KAKNLPDY  
 PNAPLNS-YKALVERPGYAPLNL EMMVMNTQIIPSVKREYITCRYHTVVPSPQIKCCGTVEC-----PKGEKADY  
 PNQVGIP-FKALIERPGYAGLPLSLVVIKSELPVSLVDYITCNYKTVVPSPYIKCCGGAEC-----SHKN EADY  
 PNKVGIP-YKALVERPGYAPVHLQIQLVNTRIIPSTNLEYITCKYKTKVPSPVVKCCGATQC-----TSKPHPDY  
 PNKVGIP-YKALVERPGYAPVHLQIQLVNTRIIPSTNLEYITCKYKTKVPSPVVKCCGATQC-----TSKPHPDY  
 PNKVGIP-YKALVERPGYAPVHLQIQLVTTKIIPSANLEYITCKYKTKVPSPVVKCCGATQC-----TSKQHPDY  
 PNKVGIP-YKALVERPGYAPVHLQIQLVTTKIIPSANLEYITCKYKTKVPSPVVKCCGSTQC-----SAKSLPDY  
 PNKVGIP-YKALVERPGYAPVHLQIQLVNTSIIPSTNLEYITCKYKTKVPSPVVKCCGATQC-----TSKPHPDY  
 PNVVGFP-YKAHIERNGFSPMTLQLEVLGTSLEPTLNLEYITCEYKTVVPSPYIKCCGTSEC-----RSMERP DY  
 PNQVGFP-YKAHVAREGYSPLTLQMQVIETSL EPTLNLEYITCDYKTKVPSPVVKCCGTAEC-----RTQDKPEY  
 PNAVGF-PYRAHVDRPGFSPPLTHMEVVSTSL EPTLALDYVTCEYKTVVPSPKVTCGMSSEC-----AHQQKADF  
 PNVPQIP-YKALVERAGYAPLNL EITVMSSEVL PSTNQEYITCKFTTVVPSPKVKCCGSLEC-----QPAAHADY  
 PNVPQIP-YKALVERAGYAPLNL EITVMSSEVL PSTNQEYITCKFTTVVPSPKIKCCGSLEC-----QPAAHADY  
 PNVVGFP-YKAHIERNXFS PMTLQLEVVXSL EPTLNLEYITCEYKTVVSPFIKCCGTSEC-----SSKEQPDY  
 PNVVGFP-YKAHIERNGFSPMTLQLEVVETSWEPTLNLEYITCEYKTVVSPFIKCCGTSEC-----SSKEQPDY  
 PNVVGFP-YKAHIERNGFSPMTLQLEVLGTSLEPTLNLEYITCEYKTVPPYIKCCGASEC-----RSMERP DY  
 PMDPRAPSYEAVINRNGYDPLKLTISVNFVTVISPTTAL EYVTCAGVPIVEPPHVGCCTSVSCPSDLSTLHAFTGKAVSDV  
 PNVVGFP-YKAHIERNPGYS PLTLQMQVVETSL EPTLNLEYITCEYKTVVSPYVKCCGASEC-----STKEKPDY  
 PMDPRAPSYEAVINRNGYDPLKLTIAVNFVTVISPTTAL EYVTCAGVPVVEPPHVGCCTSVSCPSDLSTLHAFTGKAVSDV  
 PSQAGIP-YNTIIVNRAGYAPLPISITPTKIKLIPTVNL EYVTCHYKTGMDSPAIKCCGSQEC-----TPTYRPDE  
 PNQAGIS-YNTIIVNRAGYAPLPISITPTKIKLIPTVNL EYVTCHYKTGMDSPAITKCCGSQEC-----TPTYRPDE  
 PNQVGIP-YNTIIVNRAGYAPLPISIVPTKIKLIPTVNL EYVTCHYKTGMDSPAIKCCGSQEC-----SPTYRPDE  
 PSQAGIS-YNTIIVNRAGYAPLPISITPTKIKLIPTVNL EYVTCHYKTGMDSPAIKCCGSQEC-----TPTYRPDE  
 PSQAGIS-YNTIIVNRAGYAPLPISITPTKIKLIPTVNL EYVTCHYKTGMDSPAIKCCGSQEC-----TPTYRPDE  
 PSQAGIS-YNTIIVNRAGYAPLPISITPTKIKLIPTVNL EYVTCHYKTGMDSPAIKCCGSQEC-----TPTYRPDE  
 PNVPGIP-YKALVERAGYAPLNL EITVVSSELTPSTNKEYVTCRFHTVIPSPQVKCCGSLEC-----KASSKADY  
 P...s.hps hltR..assh.lph.....h.Psh..-YhTcthshsh.sp.ltCht..pC.....s-  
 Ps.sths.Yps hlpRsGauPh.lph t..t.pI.Pohsh-YITCcapThhsShlKCCGs.pC.....pst.hsD.  
 PN.sGhP.YcshlpRsGYuPh.lphlp hspI.PohsL-YITCcYKThhsShlKCCGstpC.....psp.hsDh  
 PntsGhP.YKslvPrsGYuPhslplphlp hspI.PohsLEYITCcYKThlPSPhlKCCGosEC.....psptpPDY

SCKVFTGVYPFMWGGAYCFCD<sup>.</sup>ENTQLSEAHV<sup>.</sup>EKSESCKTE<sup>2</sup>--FASAYRAHTASASAK<sup>.</sup>LRVLVYQGN<sup>.</sup>ITVT--AYANGDHA  
 SCKVFTGVYPFMWGGAYCFCD<sup>.</sup>ENTQLSEAHV<sup>.</sup>EKSESCKTE--FASAYRAHTASASCK<sup>.</sup>LRVLVYQGN<sup>.</sup>ITVTS--AYANGDHA  
 SCKVFTGVYPFMWGGAYCFCD<sup>.</sup>ENTQLSEAHV<sup>.</sup>EKSESCKTE--FASAYRAHTASASAK<sup>.</sup>LRVLVYQGN<sup>.</sup>ITVA--AYANGDHA  
 NCKVFTGVYPFMWGGAYCFCD<sup>.</sup>ENTQLSEAHV<sup>.</sup>EKSESCKTE--FASAYRAHTASVSAK<sup>.</sup>LRVIFYQGN<sup>.</sup>ITVTS--AYANGDHA  
 NCKVFTGVYPFMWGGAYCFCD<sup>.</sup>ENTQLSEAHV<sup>.</sup>EKSESCKTE--FASAYRAHTASVSAK<sup>.</sup>LRVIFYQGN<sup>.</sup>ITVTS--AYANGDHA  
 NCKVFTGVYPFMWGGAYCFCD<sup>.</sup>ENTQLSEAHV<sup>.</sup>EKSESCKTE--FASAYRAHTASVSAK<sup>.</sup>LRVIFYQGN<sup>.</sup>ITVTS--AYANGDHA  
 TCKVFTGVYPFMWGGAYCFCD<sup>.</sup>SENSQLSDKYVELSTDCATD--HAAEYRV<sup>.</sup>HTASVKSQ<sup>.</sup>LRITYGNSTAQVD--VFVNGVTP  
 KCSVFTGVYPFMWGGAYCFCD<sup>.</sup>TENSQMSSEVYVTRGESCEAD--HAAIAQVHTASLKAQVMISIGEL<sup>.</sup>NCTVD--VFVNGDSP  
 QCOVFTGVYPFMWGGAYCFCD<sup>.</sup>TENTQMSSEAYVERSEEC<sup>.</sup>SID--HAKAYKVHTGTVOAMVNITYGSVTWRSADVYNGETP  
 QCOVFTGVYPFMWGGAYCFCD<sup>.</sup>TENTQMSSEAYVERSEEC<sup>.</sup>SID--HAKAYKVHTGTVOAMVNITYGSVSWRSADVYNGETP  
 QCOVFAAGVYPFMWGGAYCFCD<sup>.</sup>TENTQMSSEAYIERAEEC<sup>.</sup>SVD--QAKAYKVHTGTVOAVVNITYGSVSWRSADVYNGETP  
 QCOVFTGVYPFMWGGAYCFCD<sup>.</sup>TENTQMSSEAYIERAEEC<sup>.</sup>SVD--QAKAYKVHTGTVOAVVNITYGSVSWRSADVYNGETP  
 QCOVFTGVYPFMWGGAYCFCD<sup>.</sup>TENTQMSSEAYVERSEEC<sup>.</sup>SID--HAKAYKVHTGTVOAMVNITYGSVSWRSADVYNGETP

|                |                  |        |       |
|----------------|------------------|--------|-------|
| 14             | sp Q5Y388.1 POLS | 99.8%  | 59.5% |
| 15             | sp Q8QZ72.1 POLS | 99.2%  | 58.1% |
| 16             | sp Q80S27.1 POLS | 100.0% | 57.4% |
| 17             | sp P27285.1 POLS | 98.8%  | 45.7% |
| 18             | sp P03316.1 POLS | 98.8%  | 45.7% |
| 19             | sp P13890.1 POLS | 99.6%  | 57.3% |
| 20             | sp P08491.3 POLS | 99.6%  | 58.3% |
| 21             | sp Q9JGK8.1 POLS | 99.8%  | 58.7% |
| 22             | sp Q8JJX0.1 POLS | 99.8%  | 33.6% |
| 23             | sp P03315.1 POLS | 99.6%  | 59.3% |
| 24             | sp Q8QL52.1 POLS | 100.0% | 33.8% |
| 25             | sp P36329.1 POLS | 99.0%  | 49.8% |
| 26             | sp P36330.1 POLS | 99.0%  | 48.8% |
| 27             | sp P36331.1 POLS | 99.0%  | 50.0% |
| 28             | sp P36332.1 POLS | 99.0%  | 49.4% |
| 29             | sp P05674.1 POLS | 98.8%  | 49.2% |
| 30             | sp P09592.2 POLS | 98.8%  | 49.2% |
| 31             | sp P13897.1 POLS | 98.8%  | 42.8% |
| consensus/100% |                  |        |       |
| consensus/90%  |                  |        |       |
| consensus/80%  |                  |        |       |
| consensus/70%  |                  |        |       |

QCQVYTGVPFPMWGGAYCFCDTENTQLSEAYVDRSDVCKHD--HAAAYKAHTAAMKATIRISYGNLNQTTT-AFVNGEHT  
 KCAVFTGVYPFPMWGGAYCFCDSENTQMSAYVERADVCKHD--HAAAYRAHTASLRKIKVITYGTVNQTE-AFVNGDHA  
 QCKVYTGVPFPMWGGAYCFCDSENTQLSEAYVERSEVCKHD--HAAAYRAHTAALKAKISVITYGSTNGTAE-AFVNGEST  
 TCKVFGGVYPFPMWGGAYCFCDSENSQMSAYVELSADCATD--HAQAIKVHTAAMKVGRLVYGNNTTSFLD-VYVNGVTP  
 TCKVFGGVYPFPMWGGAYCFCDSENSQMSAYVELSADCASD--HAQAIKVHTAAMKVGRLVYGNNTTSFLD-VYVNGVTP  
 QCKVYTGVPFPMWGGAYCFCDSENTQLSEAYVDRSDVCKHD--HALAYKAHTASLKATIRISYGTINQITE-AFVNGEHA  
 QCKVYTGVPFPMWGGAYCFCDSENTQLSEAYVDRSDVCKHD--HASAYKAHTASLKATIRISYGTINQITE-AFVNGEHA  
 QCQVYTGVPFPMWGGAYCFCDTENTQLSEAYVDRSDVCKHD--HAAAYKAHTAAMKATIRISYGNLNQTTT-AFVNGEHT  
 HCDVHTNVYPLLWGAHCFCSTENTQVSAVAATVSEFCAQDSERAEAFSVHSSSVTAEVLVTLGEVVTAVH-VYVDGVT  
 QCKVYTGVPFPMWGGAYCFCDSENTQLSEAYVDRSDVCKHD--HASAYKAHTASLKAKVRVMYGNVNQTVD-VYVNGDHA  
 HCDVHTNVYPLLWGAHCFCSTENTQVSAVAATVSEFCAQDSERAEAFSVHSSSVTAEILVTLGEVVTAVH-VYVDGVT  
 QCKVFTGVYPFPMWGGAYCFCDTENTQVSKAYVKSDDCLAD--HAEAYKAHTASVQAFLNITVGEHSIVTT-VYVNGETP  
 QCKVFTGVYPFPMWGGAYCFCDTENTQVSKAYVKSDDCLAD--HAAAYKAHTASVQAFLNITVGEHSIVTT-VYVNGETP  
 QCKVFTGVYPFPMWGGAYCFCDTENTQVSKAYVKSDDCLAD--HAEAYKAHTASVQAFLNITVGEHSIVTT-VYVNGETP  
 QCKVFTGVYPFPMWGGAYCFCDTENTQVSKAYVKSDDCLAD--HAEAYKAHTASVQAFLNITVGEHSIVTT-VYVNGETP  
 QCKVFTGVYPFPMWGGAYCFCDTENTQVSKAYVKSDDCLAD--HAEAYKAHTASVQAFLNITVGEHSIVTT-VYVNGETP  
 QCKVFTGVYPFPMWGGAYCFCDTENTQVSKAYVKSDDCLAD--HAEAYKAHTASVQAFLNITVGEHSIVTT-VYVNGETP  
 QCKVFTGVYPFPMWGGAYCFCDTENTQVSKAYVKSDDCLAD--HAEAYKAHTASVQAFLNITVGEHSIVTT-VYVNGETP  
 TCRVFGGVYPFPMWGGAYCFCDSENTQLSEAYVEFAPDCTID--HAVALKVHTAALKVGRLVYGNNTTAHLD-TFVNGVTP  
 pCtVassYVPhhWGAHCFCSENQhSthhh.hu...C...A.AhpsHoushps.1.1.htt.s.....sassG.ps  
 pCpVasGVYPFhWGAHCFCDSENQhScsa1.hup.C.h...hAtAh+sHTushpu.lpl.htt.s.hst.sasNG.ps  
 pCpVatGVYPFPMWGGAYCFCDSENTQhScAaVp+S...CttD...aAtAY+sHTuohpAhlp1hhGt.s.hss.saVNG-ps  
 pCcVFTGVYPFPMWGGAYCFCDSENTQLSEAYV-+S-sCttD...+ApAY+sHTAolpAhlp1sYGshshss.sYVNG-ps

|    |    |          |      |        |        |
|----|----|----------|------|--------|--------|
|    |    |          | cov  | pid    | 241    |
| 1  | sp | Q8JUX5.3 | POLS | 100.0% | 100.0% |
| 2  | sp | Q5WQY5.1 | POLS | 100.0% | 96.8%  |
| 3  | sp | Q5XXP3.1 | POLS | 100.0% | 96.4%  |
| 4  | sp | P22056.1 | POLS | 100.0% | 87.3%  |
| 5  | sp | Q90371.1 | POLS | 100.0% | 88.1%  |
| 6  | sp | Q90369.1 | POLS | 100.0% | 87.9%  |
| 7  | sp | Q86925.2 | POLS | 98.4%  | 44.6%  |
| 8  | sp | P89946.2 | POLS | 99.4%  | 50.7%  |
| 9  | sp | P08768.1 | POLS | 99.0%  | 47.7%  |
| 10 | sp | Q4QXJ7.1 | POLS | 99.2%  | 49.9%  |
| 11 | sp | Q306W5.1 | POLS | 99.2%  | 48.9%  |
| 12 | sp | Q306W7.1 | POLS | 99.2%  | 49.5%  |
| 13 | sp | P27284.1 | POLS | 99.0%  | 48.1%  |
| 14 | sp | Q5Y388.1 | POLS | 99.8%  | 59.5%  |
| 15 | sp | Q8QZ72.1 | POLS | 99.2%  | 58.1%  |
| 16 | sp | Q80S27.1 | POLS | 100.0% | 57.4%  |
| 17 | sp | P27285.1 | POLS | 98.8%  | 45.7%  |
| 18 | sp | P03316.1 | POLS | 98.8%  | 45.7%  |
| 19 | sp | P13890.1 | POLS | 99.6%  | 57.3%  |
| 20 | sp | P08491.3 | POLS | 99.6%  | 58.3%  |
| 21 | sp | Q9JGK8.1 | POLS | 99.8%  | 58.7%  |
| 22 | sp | Q8JJX0.1 | POLS | 99.8%  | 33.6%  |
| 23 | sp | P03315.1 | POLS | 99.6%  | 59.3%  |

VT VKDAKFIVGPMSSAWTPFDNKIVVYKGDVYNDYPPFAGRPGQFGDIQSRTP---ESKDVYANTQLVLQRPAAGTVH  
 VT VKDAKFIVGPMSSAWTPFDNKIVVYKGDVYNDYPPFAGRPGQFGDIQSRTP---ESKDVYANTQLVLQRPSAGTVH  
 VT VKDAKFIVGPMSSAWTPFDNKIVVYKGDVYNDYPPFAGRPGQFGDIQSRTP---ESKDVYANTQLVLQRPAAGTVH  
 VT VEDAKFVIGPLSSAWSFPDNKIVVYKGEVYNDYPPFAGRPGQFGDIQSRTP---DSKDVYANTQLILQRPAAGATH  
 VT VKDAKFVIGPLSSAWSFPDNKIVVYKGEVYNDYPPFAGRPGQFGDIQSRTP---DSKDVYANTQLILQRPAAGATH  
 VT VKDAKFVIGPLSSAWSFPDNKIVVYKGEVYNDYPPFAGRPGQFGDIQSRTP---DSKDVYANTQLILQRPAAGATH  
 ARSKDWKLIAGPLSTTFSPFDNKVIYHGVYNDYPPFAGRPGQFGDIQSRTP---TGSDDLANTAIHLQRPEARNTI  
 ARIQQSKFILGPISSAWSFPDHIKIVYRDEVYNDYPPFAGRPGQFGDIQSRTV---NSTDVYANTNLKLQRPASGNVH  
 AKIGDAKLIIGPLSSAWSFPDNKIVVYGHVYNDYPPFAGRPGQFGDIQSRTS---TSNDLYANTNLKLQRPPAGIVH  
 AKIGDAKLIIGPLSSAWSFPDNKIVVYGHVYNDYPPFAGRPGQFGDIQSRTS---TSNDLYANTNLKLQRPPAGIVH  
 AKIGDAKLTIGPLSSAWSFPDVKIVVYGHVYNDYPPFAGRPGQFGDIQSRTL---TSNDLYANTNLKLQRPPGVVH  
 AKIGDAKLTIGPLSSAWSFPDVKIVVYGHVYNDYPPFAGRPGQFGDIQSRTL---TSNDLYANTNLKLQRPPGVVH  
 AKIGDAKLTIGPLSSAWSFPDVKIVVYGHVYNDYPPFAGRPGQFGDIQSRTL---TSNDLYANTNLKLQRPPGVVH  
 AKIGDAKLTIGPLSSAWSFPDVKIVVYGHVYNDYPPFAGRPGQFGDIQSRTL---TSNDLYANTNLKLQRPPGVVH  
 VT VGGSRFTFGPISTAWTPFDNKIVVYKNDVYNDYPPYGSQPGFRFGDIQSRTV---ESKDLYANTALKLSRPSSTVH  
 VTIAGTKFIFGPVSTPMTPTFDNKILVYKGEVYNDYPPYGSQPGFRFGDIQSRTL---DSKDLYANTALKLSRPSAGTVH  
 ARIGDLKILGPISTAWSFPDVKIVVYKDEVYNDYPPYGSQPGFRFGDIQSRTL---ESKDLYANTALKLSRPSAGTVH  
 GTSKDLKVIAGPISASFTPTFDHKLVIHRLVYNDYPPYGSQPGFRFGDIQSRTL---TSKDLIASTDIRLLKPSAKNVH  
 GTSKDLKVIAGPISASFTPTFDHKLVIHRLVYNDYPPYGSQPGFRFGDIQSRTL---TSKDLIASTDIRLLKPSAKNVH  
 VNVGGSKFIFGPISSTAWSFPDVKIVVYKDDVYNDYPPYGSQPGFRFGDIQSRTV---ESKDLYANTALKLSRPSGVVH  
 VNVGGSKFIFGPISSTAWSFPDVKIVVYKDDVYNDYPPYGSQPGFRFGDIQSRTV---ESKDLYANTALKLSRPSGVVH  
 VNVGGSKFIFGPISSTAWSFPDVKIVVYKDDVYNDYPPYGSQPGFRFGDIQSRTV---ESKDLYANTALKLSRPSGVVH  
 VNVGGSKFIFGPISSTAWSFPDVKIVVYKDDVYNDYPPYGSQPGFRFGDIQSRTV---ESKDLYANTALKLSRPSGVVH  
 ARGTDKIVAGPITTDYSPFDRKIVRIGEEVYNDYPPYGSQPGFRFGDIQSRTV---ESKDLYANTALKLSRPSGVVH  
 VTIGGTQFIFGPISSAWTPFDNKIVVYKDEVYNDYPPYGSQPGFRFGDIQSRTV---ESKDLYANTALKLSRPSGVVH



|                |                  |        |       |
|----------------|------------------|--------|-------|
| 24             | sp Q8QL52.1 POLS | 100.0% | 33.8% |
| 25             | sp P36329.1 POLS | 99.0%  | 49.8% |
| 26             | sp P36330.1 POLS | 99.0%  | 48.8% |
| 27             | sp P36331.1 POLS | 99.0%  | 50.0% |
| 28             | sp P36332.1 POLS | 99.0%  | 49.4% |
| 29             | sp P05674.1 POLS | 98.8%  | 49.2% |
| 30             | sp P09592.2 POLS | 98.8%  | 49.2% |
| 31             | sp P13897.1 POLS | 98.8%  | 42.8% |
| consensus/100% |                  |        |       |
| consensus/90%  |                  |        |       |
| consensus/80%  |                  |        |       |
| consensus/70%  |                  |        |       |

ARGTDLKIIVAGPITTDYSPFDRKIVVRIGEEVYNYDAPPPYAGAPGTGFDIQARSTNYVKPNLDLYGDIGIEVLQPTNDHMH  
 VNFNGVKLTAGPLSTAWTPFDRKIVQYAGEIYNYDFPEYAGAPGAFGDIQSRTV---SSSDLYANTNLVLQRPKAGATH  
 VNFNGVKLTAGPLSTAWTPFDRKIVQYAGEIYNYDFPEYAGAPGAFGDIQRTV---SSSDLYANTNLVLQRPKAGATH  
 VNFNGVKLTAGPLSTAWSPFDKIVQYAGEIYNYDFPEYAGAHAGAFGDIQARTI---SSSDVYANTNLVLQRPKAGATH  
 VNFNGVKLTAGPLSTAWTPFDRKIVQYAGEIYNYDFPEYAGAPGAFGDIQSRTV---SSSDLYANTNLVLQRPKAGATH  
 VNFNGVKLTAGPLSTAWTPFDRKIVQYAGEIYNYDFPEYAGAPGAFGDIQSRTV---SSSDLYANTNLVLQRPKAGATH  
 VNFNGVKLTAGPLSTAWTPFDRKIVQYAGEIYNYDFPEYAGAPGAFGDIQSRTV---SSSDLYANTNLVLQRPKAGATH  
 GSSRDLLKVIAGPISAAFPFDHKVIRKGLVYNYDFPEYGAMKPGAFGDIQASSL---DATDIVARTDIRLLKPSVKNIH  
 sp.tt.phhhGPhossaoPFD.Kll.htt.laN.Das.aGshpsG.FGDIQ.po....pspDlhuphtl.1.pPtst.1H  
 sp.ts.KhhhGPISSaoPFDpkIV.attcLYN.DaP.aGsGpsGtFGDIQupo....pupDlhAsTtlhL.+Ptst.1H  
 sphtshKhhhGPISSaoPFDpkIVhYtt-LYN.DaP.aGuGpsGtFGDIQURT....pSpDlYANTS.hLtrRptsGs1H  
 sphtssKhhhGPISSaoPFDpkIVlyts-VYNhDaP.YGuGpGtFGDIQSRTs...pSpDlYANTS.hLpRPpuGs1H

|                |    |          |      | cov    | pid    | 321 |
|----------------|----|----------|------|--------|--------|-----|
| 1              | sp | Q8JUX5.3 | POLS | 100.0% | 100.0% |     |
| 2              | sp | Q5WQY5.1 | POLS | 100.0% | 96.8%  |     |
| 3              | sp | Q5XXP3.1 | POLS | 100.0% | 96.4%  |     |
| 4              | sp | P22056.1 | POLS | 100.0% | 87.3%  |     |
| 5              | sp | O90371.1 | POLS | 100.0% | 88.1%  |     |
| 6              | sp | O90369.1 | POLS | 100.0% | 87.9%  |     |
| 7              | sp | Q86925.2 | POLS | 98.4%  | 44.6%  |     |
| 8              | sp | P89946.2 | POLS | 99.4%  | 50.7%  |     |
| 9              | sp | P08768.1 | POLS | 99.0%  | 47.7%  |     |
| 10             | sp | Q4QXJ7.1 | POLS | 99.2%  | 49.9%  |     |
| 11             | sp | Q306W5.1 | POLS | 99.2%  | 48.9%  |     |
| 12             | sp | Q306W7.1 | POLS | 99.2%  | 49.5%  |     |
| 13             | sp | P27284.1 | POLS | 99.0%  | 48.1%  |     |
| 14             | sp | Q5Y388.1 | POLS | 99.8%  | 59.5%  |     |
| 15             | sp | Q8QZ72.1 | POLS | 99.2%  | 58.1%  |     |
| 16             | sp | Q80S27.1 | POLS | 100.0% | 57.4%  |     |
| 17             | sp | P27285.1 | POLS | 98.8%  | 45.7%  |     |
| 18             | sp | P03316.1 | POLS | 98.8%  | 45.7%  |     |
| 19             | sp | P13890.1 | POLS | 99.6%  | 57.3%  |     |
| 20             | sp | P08491.3 | POLS | 99.6%  | 58.3%  |     |
| 21             | sp | Q9JGK8.1 | POLS | 99.8%  | 58.7%  |     |
| 22             | sp | Q8JJX0.1 | POLS | 99.8%  | 33.6%  |     |
| 23             | sp | P03315.1 | POLS | 99.6%  | 59.3%  |     |
| 24             | sp | Q8QL52.1 | POLS | 100.0% | 33.8%  |     |
| 25             | sp | P36329.1 | POLS | 99.0%  | 49.8%  |     |
| 26             | sp | P36330.1 | POLS | 99.0%  | 48.8%  |     |
| 27             | sp | P36331.1 | POLS | 99.0%  | 50.0%  |     |
| 28             | sp | P36332.1 | POLS | 99.0%  | 49.4%  |     |
| 29             | sp | P05674.1 | POLS | 98.8%  | 49.2%  |     |
| 30             | sp | P09592.2 | POLS | 98.8%  | 49.2%  |     |
| 31             | sp | P13897.1 | POLS | 98.8%  | 42.8%  |     |
| consensus/100% |    |          |      |        |        |     |
| consensus/90%  |    |          |      |        |        |     |

VPYSQAPS GF KYW . KER GAS LQHTAPFGCQIATNPVRAMNCAVGNMIPISIDIPDAAFTRVVDAPSLTDYSCEVPACTHSS  
 VPYSQAPS GF KYW . KER GAS LQHTAPFGCQIATNPVRAMNCAVGNMIPISIDIPDAAFTRVVDAPSLTDYSCEVPACTHSS  
 VPYSQAPS GF KYW . KER GAS LQHTAPFGCQIATNPVRAMNCAVGNIPISIDIPDAAFTRVVDAPSVTDYSCEVPACTHSS  
 VPYSQAPS GF KYW . KER GAS LQHTAPFGCQIATNPVRAMNCAVGNIPVSIDIPDAAFTRVVDAPSVTDYSCEVASCTHSS  
 VPYSQAPS GF KYW . KER GAS LQHTAPFGCQIATNPVRAMNCAVGNIPVSIDIPDAAFTRVVDAPSVTDYSCEVASCTHSS  
 VPYSQAPS GF KYW . KER GAS LQHTAPFGCQIATNPVRAMNCAVGNIPVSIDIPDAAFTRVVDAPSVTDYSCEVASCTHSS  
 VPYTQAPS GF EFWKNNSSGQPLSDTAPFGCKVNNPLRADKCAVGSIPISIDIPDAAFTRVS-EPLPSLLKCTVTSTCTYST  
 VPYTQTPSGFSYWKKEKGVPLNRNAPFGCIIKVPVRAENCVYGNIPISMDIADAFTRIDESPSVSLKACEVQSCITYSS  
 TPFTQAPS GF ERWKRDKGAPLNDVAPFGCSIALEPLRAENCVAGSIPISIDIPDAAFTRISPTPTVSDLECKITECTYAS  
 TPFTQAPS GF ERWKRDKGAPLNDVAPFGCSIALEPLRAENCVAGSIPISIDIPDAAFTRISPTPTVSDLECKITECTYAS  
 TPYTQAPS GF ERWKRDKGAPLNDIAPFGCTIALDPLRAENCVAGNIPISIDIPDAAFTRISPTPTVSDLECKITECTYAS  
 TPFTQAPS GF ERWKRDKGAPLNDVAPFGCSIALEPLRAENCVAGSIPISIDIPDAAFTRISPTPTVSDLECKITECTYAS  
 VPYTQTPSGFKYW . KER GTS LNDKAPFGCVIKTNPVRAENCVAGNIPVSMDIPDAFTRVVDAPAVTNLECOVAVCTHSS  
 VPYTQTPSGFKTWKQKRDSP LNAKAPFGCIIKTNPVRAENCVAGNIPVSMDIADSAFTRLTDAPVISELTCTVSTCTHSS  
 VPYTQTPSGFKYW . KER GDALN . KAPFGCIIKTNPVRAENCVAGNIPVSMDIPDAAFTRVVDAPSLTGLKCEVATCTHSS  
 VPYTQAPS GF EMWKNNSSGRPLQETAPFGCKIAVNP LRAVDCSYGNIPISIDIPNAAFIRTS DAPLVSTVKCDVSECTYSA  
 VPYTQAPS GF EMWKNNSSGRPLQETAPFGCKIAVNP LRAVDCSYGNIPISIDIPNAAFIRTS DAPLVSTVKCEVSECTYSA  
 VPYTQTPSGFKYW . KER GSSLNTKAPFGCKIKTNPVRAENCVAGSIPVSMDIPDAFTRVVDAPAVTDLS CQVAVCTHSS  
 VPYTPTPS GF KYW . KER GSSLNTKAPFGCKIKTNPVRAENCVAGSIPVSMDIPDAFTRVVDAPAVTDLS CQVAVCTHSS  
 VPYTQTPSGFKYW . KER GTS LNDKAPFGCVIKTNPVRAENCVAGNIPVSMDIPDAFTRVVDAPAVTNLECOVAVCTHSS  
 VAYTYTSSGLLRWLDAPKPLSVTAPHGCKISANPLALDCGVGAVPMSINIPDAKFTRKLKDPKPSALKCVVDSCEYGV  
 VPYTQTPSGFKYW . KER GTALNTKAPFGCQIKTNPVRAENCVAGNIPVSMDIPDAFTRVVDAPAVTNLECOVAVCTHSS  
 VAYTYTSSGLLRWLDAPKPLSVTAPHGCKISANPLALDCGVGAVPMSINIPDAKFTRKLKDPKPSALKCVVDSCEYGV  
 VPYTQAPS GF EQWKOKAPSLKFTAPFGCEIYTNPIRAENCVAGSIPLAFDIPDALFTRVSETPTLSAAECTLNECVYSS  
 VPYTQAVSGYEMWKNNSSGRPLQETAPFGCKIEVEPLRASNCAYGHIPISIDIPDAAFVRSSESPTILEV SCTVADCIYSA  
 ssao.ssSgh..w.ppts.sLp..APA GC.1.hpPlhs.pCshGthPhuhs1ssshFhR...tp....htC.1..C. aus  
 spYQssSGac.Wnppps.sLp.hAPFGC.I.hpPlRA.sCuhGslpluhDIPDuhFTRh.-sp.lothpCpls.Csauu

consensus/80%

consensus/70%

VPYTS<sup>S</sup>SGF<sup>ch</sup>Wh<sup>+</sup>++uss<sup>L</sup>p.pAPFGCpItsNPIRA.sCAVGsIPI<sup>Sh</sup>DIPDA<sup>t</sup>FTRLs-s<sup>Ps</sup>loshpCpl<sup>st</sup>Csau<sup>S</sup>  
 VPYTS<sup>S</sup>SGF<sup>ch</sup>Wh<sup>K</sup>++Gss<sup>L</sup>ppsAPFGCpItsNPIRA.NCAVGsIPI<sup>Sh</sup>DIPDA<sup>t</sup>FTRLs-s<sup>Ps</sup>loshpCpl<sup>sp</sup>C<sup>Ta</sup>SS

|    |    |          | cov            | pid    | 401    |                                                                                                                                                                  | 480 |
|----|----|----------|----------------|--------|--------|------------------------------------------------------------------------------------------------------------------------------------------------------------------|-----|
| 1  | sp | Q8JUX5.3 | POLS           | 100.0% | 100.0% | DFGGVAIIKYAVSKKKCAVHSTMNAVITIREAELEVEG-NSQ <sup>Q</sup> ISFSTALASAEFRVQVCSTQVHCAA <sup>E</sup> CHPPKDHIVN                                                        |     |
| 2  | sp | Q5WQY5.1 | POLS           | 100.0% | 96.8%  | DFGGAIIKYAASKKKCAVHSTMNAVITIREAELEVEG-NSQ <sup>Q</sup> ISFSTALASAEFRVQVCSTQVHCAA <sup>E</sup> CHPPKDHIVN                                                         |     |
| 3  | sp | Q5XXP3.1 | POLS           | 100.0% | 96.4%  | DFGGVAIIKYTASKKKCAVHSTMNAVITIREADV <sup>E</sup> EG-NSQ <sup>Q</sup> ISFSTALASAEFRVQVCSTQVHCAA <sup>E</sup> CHPPKDHIVN                                            |     |
| 4  | sp | P22056.1 | POLS           | 100.0% | 87.3%  | DFGGAIVIKYTASKKKCAVHSTMNAVITIREPNVDVKG-TAQ <sup>Q</sup> IAFSTALASAEFKVQICSTLVHCSAT <sup>E</sup> CHPPKDHIVN                                                       |     |
| 5  | sp | O90371.1 | POLS           | 100.0% | 88.1%  | DFGGAIVIKYTASKKKCAVHSTMNAVITIREPNVDV <sup>E</sup> EG-TAQ <sup>Q</sup> IAFSTALASAEFKVQICSTQVHCSAT <sup>E</sup> CHPPKDHIVN                                         |     |
| 6  | sp | O90369.1 | POLS           | 100.0% | 87.9%  | DFGGAIVV <sup>K</sup> YTASKKKCAVHSTMNAVITIREPNVDV <sup>E</sup> EG-TAQ <sup>Q</sup> IAFSTALASAEFKVQICSTQVHCSAT <sup>E</sup> CHPPKDHIVN                            |     |
| 7  | sp | Q86925.2 | POLS           | 98.4%  | 44.6%  | DYGGVLVLTYESDRAGOC <sup>A</sup> AVHSHSSTAVLRDPSVY <sup>E</sup> EQ-KGETTLKFSTRSLQADFEVSMCGTRTTCHAQCOP <sup>E</sup> TEHVMN                                         |     |
| 8  | sp | P89946.2 | POLS           | 99.4%  | 50.7%  | DFGGVASTISYTSN <sup>K</sup> VGKCAI <sup>H</sup> SHSN <sup>S</sup> SATMKDSVQDV <sup>E</sup> QE-SGA <sup>L</sup> SLFFATSSVEPNFV <sup>Q</sup> VCNARITCHGKCEPPKDHIVP |     |
| 9  | sp | P08768.1 | POLS           | 99.0%  | 47.7%  | DFGGIATLPTNPVKQETVQFIVHQVLQLLKRMTSP <sup>L</sup> LLR-AGSFTFHFSTANIHPAFK <sup>L</sup> QVCTSGITCKGDC <sup>K</sup> PPKDHIVD                                         |     |
| 10 | sp | Q4QXJ7.1 | POLS           | 99.2%  | 49.9%  | DFGGIATVAYKSSKAGNCPIHSPSGVAVIKENDVT <sup>L</sup> LAE-SGSFTFHFSTANIHPAFK <sup>L</sup> QVCTSAVTC <sup>K</sup> GDC <sup>K</sup> PPKDHIVD                            |     |
| 11 | sp | Q306W5.1 | POLS           | 99.2%  | 48.9%  | DFGGIATVAYKASKAGNCPIHSPSGIAV <sup>I</sup> IKENDVT <sup>L</sup> LAD-SGSFTFHFSTASIHPAFK <sup>M</sup> QICTSVVTC <sup>K</sup> GDC <sup>K</sup> PPKDHIVD              |     |
| 12 | sp | Q306W7.1 | POLS           | 99.2%  | 49.5%  | DFGGIATISYKASKAGNCPIHSPSGIAV <sup>I</sup> IKENDVT <sup>L</sup> LAD-SGAFTFHFSTASIHPAFK <sup>M</sup> QICTSVVTC <sup>K</sup> GDC <sup>K</sup> PPKDHIVD              |     |
| 13 | sp | P27284.1 | POLS           | 99.0%  | 48.1%  | DFGGIATLPTNPVKQETVQFILHQVLQLLKRMTSP <sup>L</sup> LLR-AGSFTFHFSTANIHPAFK <sup>L</sup> QVCTSGVT <sup>C</sup> KGDC <sup>K</sup> PPKDHIVD                            |     |
| 14 | sp | Q5Y388.1 | POLS           | 99.8%  | 59.5%  | DFGGIATLTFTKTDK <sup>PK</sup> CAVHSHSNVATIQEA <sup>A</sup> VDIKT-DGKITLHFSTAS <sup>A</sup> SPAFKVSVC <sup>S</sup> AKTT <sup>C</sup> MAACEPPKDHIVP                |     |
| 15 | sp | Q8QZ72.1 | POLS           | 99.2%  | 58.1%  | DFGGIAVL <sup>S</sup> YKVEKSGRCDI <sup>H</sup> SHSNVAVLQEV <sup>S</sup> LETE---GRSVTHFSTAS <sup>A</sup> SPSFVVSVC <sup>S</sup> SRATCTAKCEPPKDHIVT                |     |
| 16 | sp | Q80527.1 | POLS           | 100.0% | 57.4%  | DFGGTLVVEYKTDK <sup>VG</sup> CAVHSESN <sup>T</sup> AVMQETSLSV <sup>T</sup> LM-DGRGTLHFSTAS <sup>A</sup> SPSFVLKVC <sup>S</sup> SKTTCTAKCVPPKDHIVP                |     |
| 17 | sp | P27285.1 | POLS           | 98.8%  | 45.7%  | DFGGMATLQYVSDREGQCPVHSHSSTATLQESTV <sup>H</sup> VLE-KGAVTVHFSTAS <sup>P</sup> QANFIVSLCGKTT <sup>C</sup> NAECKPPADHIVS                                           |     |
| 18 | sp | P03316.1 | POLS           | 98.8%  | 45.7%  | DFGGMATLQYVSDREGQCPVHSHSSTATLQESTV <sup>H</sup> VLE-KGAVTVHFSTAS <sup>P</sup> QANFIVSLCGKTT <sup>C</sup> NAECKPPADHIVS                                           |     |
| 19 | sp | P13890.1 | POLS           | 99.6%  | 57.3%  | DFGXVATLSYKTDK <sup>PK</sup> CAVHSHSNVATLQEA <sup>T</sup> VDVKE-DGKVTVHFSTAS <sup>A</sup> SPAFKVSVC <sup>D</sup> AKTTCTAACEPPKDHIVP                              |     |
| 20 | sp | P08491.3 | POLS           | 99.6%  | 58.3%  | DFGGVATLSYKTDK <sup>PK</sup> CAVHSHSNVATLQEA <sup>T</sup> VDVKE-DGKVTVHFSTAS <sup>A</sup> SPAFKVSVC <sup>D</sup> AKTTCTAACEPPKDHIVP                              |     |
| 21 | sp | Q9JGK8.1 | POLS           | 99.8%  | 58.7%  | DFGGIATLTFTKTDK <sup>PK</sup> CAVHSHSNVATIQEA <sup>A</sup> VDIKT-DGKITLHFSTAS <sup>A</sup> SPAFMVSVC <sup>S</sup> AKTT <sup>C</sup> MAACEPPKDHIVP                |     |
| 22 | sp | Q8JJX0.1 | POLS           | 99.8%  | 33.6%  | DYGGAATITTYEGHEAGKCGI <sup>H</sup> SLTPGVPLRTSV <sup>E</sup> VVAGANTVKTT <sup>F</sup> SSPTPEVALEVEIC <sup>S</sup> AI <sup>V</sup> KCAGECTPPKEH <sup>V</sup> VA   |     |
| 23 | sp | P03315.1 | POLS           | 99.6%  | 59.3%  | DFGGVLTLT <sup>Y</sup> TKTNK <sup>NG</sup> CSVHSHSNVATLQEA <sup>T</sup> AKVKT-AGKVTLHFSTAS <sup>A</sup> SPSFVVSVC <sup>S</sup> SARATCSASCEPPKDHIVP               |     |
| 24 | sp | Q8QL52.1 | POLS           | 100.0% | 33.8%  | DYGGAATITTYEGHEAGKCGI <sup>H</sup> SLTPGVPLRTSV <sup>E</sup> VVAGANTVKTT <sup>F</sup> SSPTPEVTLEVEIC <sup>S</sup> AI <sup>V</sup> KCASECTPPKEH <sup>V</sup> VA   |     |
| 25 | sp | P36329.1 | POLS           | 99.0%  | 49.8%  | DFGGIATVKYSASKSGKCAVHVP <sup>S</sup> GTATLKEAA <sup>E</sup> ELAE-QGSATIH <sup>F</sup> STANIHP <sup>E</sup> FR <sup>L</sup> QICTSYVTCKGDC <sup>H</sup> PPKDHIVT   |     |
| 26 | sp | P36330.1 | POLS           | 99.0%  | 48.8%  | DFGGIATVKYSASKSGKCAVHVP <sup>S</sup> GTATLKEAS <sup>V</sup> ELAE-QGSVTIH <sup>F</sup> STANIHP <sup>E</sup> FR <sup>L</sup> QICTSFVTCKGDC <sup>H</sup> PPKDHIVT   |     |
| 27 | sp | P36331.1 | POLS           | 99.0%  | 50.0%  | DFGGIATVKYSASKSGKCAVHVP <sup>S</sup> GTATLKEAA <sup>V</sup> ELAE-QGSATIH <sup>F</sup> STASIHP <sup>E</sup> FR <sup>L</sup> QICTSYVTCKGDC <sup>H</sup> PPKDHIVT   |     |
| 28 | sp | P36332.1 | POLS           | 99.0%  | 49.4%  | DFGGIATVKYSASKSGKCAVHVP <sup>S</sup> GTATLKEAA <sup>V</sup> ELTE-QGSATIH <sup>F</sup> STANIHP <sup>E</sup> FR <sup>L</sup> QICTSYVTCKGDC <sup>H</sup> PPKDHIVT   |     |
| 29 | sp | P05674.1 | POLS           | 98.8%  | 49.2%  | DFGGIATVKYSASKSGKCAVHVP <sup>S</sup> GTATLKEAA <sup>V</sup> ELTE-QGSATIH <sup>F</sup> STANIHP <sup>E</sup> FR <sup>L</sup> QICTSYVTCKGDC <sup>H</sup> PPKDHIVT   |     |
| 30 | sp | P09592.2 | POLS           | 98.8%  | 49.2%  | DFGGIATVKYSASKSGKCAVHVP <sup>S</sup> GTATLKEAA <sup>V</sup> ELTE-QGSATIH <sup>F</sup> STANIHP <sup>E</sup> FR <sup>L</sup> QICTSYVTCKGDC <sup>H</sup> PPKDHIVT   |     |
| 31 | sp | P13897.1 | POLS           | 98.8%  | 42.8%  | DFGGSLTLQYKADREG <sup>H</sup> CPVHSHSSTAVLKEAT <sup>H</sup> VTAVTA-VGSITLHFSTSSPQANFIVSLCGKTT <sup>C</sup> NAECKPPADHITIG                                        |     |
|    |    |          | consensus/100% |        |        | DaG..h.l.h.s.c.tps.hh..ps...hpp....h....st..h.Fu....psth.hphCst.hpC.utC.PPt-HlHs                                                                                 |     |
|    |    |          | consensus/90%  |        |        | DFGGnhsltatss+.GpCslHs.oshsslpcsshpl.t.tuthphtFSTs..pstFhlpCcss.spCtutCpppDhIvs                                                                                  |     |
|    |    |          | consensus/80%  |        |        | DFGGhAslpYpssKtGpCslHs.osssslpcsspltt.tuphphpFSTAshpstFhlpCsshspCtupCcPPKDHIVs                                                                                   |     |
|    |    |          | consensus/70%  |        |        | DFGGhAolpYpssKtGpCuVHs.ossssl+Esslcltt.pgphol+FSTAshpstFclpCoshstCpupCcPPKDHIVs                                                                                  |     |

|   |    |          | cov  | pid    | 481    |                                                                    | 536 |
|---|----|----------|------|--------|--------|--------------------------------------------------------------------|-----|
| 1 | sp | Q8JUX5.3 | POLS | 100.0% | 100.0% | YPASHTTLGVQDISATAMSWQKITGGVGLVVAALILIVVLCV <sup>S</sup> FSRH-----  |     |
| 2 | sp | Q5WQY5.1 | POLS | 100.0% | 96.8%  | YPASHTTLGVQDISATAMSWQKITGGVGLVVAALILIVVLCV <sup>S</sup> FSRH-----  |     |
| 3 | sp | Q5XXP3.1 | POLS | 100.0% | 96.4%  | YPASHTTLGVQDISITAMSWQKITGGVGLVVAALILIVVLCV <sup>S</sup> FSRH-----  |     |
| 4 | sp | P22056.1 | POLS | 100.0% | 87.3%  | YPSPHHTTLGVQDISITAMSWQKITGGVGLVVAALILIVVLCV <sup>S</sup> FSRH----- |     |
| 5 | sp | O90371.1 | POLS | 100.0% | 88.1%  | YPSPHHTTLGVQDISITAMSWQKITGGVGLVVAALILIVVLCV <sup>S</sup> FSRH----- |     |
| 6 | sp | O90369.1 | POLS | 100.0% | 87.9%  | YPSPHHTTLGVQDISITAMSWQKITGGVGLVVAALILIVVLCV <sup>S</sup> FSRH----- |     |

|                |          |      |        |       |                                                          |
|----------------|----------|------|--------|-------|----------------------------------------------------------|
| 7 sp           | Q86925.2 | POLS | 98.4%  | 44.6% | RPOKSTPDFSSAITSKTSWNWITALMGGISSIAATAAIVLVIALVFTAQHR----- |
| 8 sp           | P89946.2 | POLS | 99.4%  | 50.7% | YAAKINDAEFPSTISITAWQWLAHTTSGPLTILVVAIIIVVVVSIVVCARH----- |
| 9 sp           | P08768.1 | POLS | 99.0%  | 47.7% | YPAQHTESFTSAISATAWSWLKVLVGGTSAFIVLGLIATAVVALVLFHRRH----- |
| 10 sp          | Q4QXJ7.1 | POLS | 99.2%  | 49.9% | YPAQHTESFTSAISATAWSWLKVLVGGTSAFIVLGLIATAVVALVLFHRRH----- |
| 11 sp          | Q306W5.1 | POLS | 99.2%  | 48.9% | YPAQHTETFTSAVSATAWSWLKVLVGGTSAFIVLGLIATAVVALVLFTHKH----- |
| 12 sp          | Q306W7.1 | POLS | 99.2%  | 49.5% | YPAQHTETYTSAVSATAWSWLKVLVGGTSAFIVLGLIATAVVALVLFTHRH----- |
| 13 sp          | P27284.1 | POLS | 99.0%  | 48.1% | YPAQHTESFTSAISATAWSWLKVLVGGTSAFIVLGLIATAVVALVLFHRRH----- |
| 14 sp          | Q5Y388.1 | POLS | 99.8%  | 59.5% | YGASHNNQVFPDMSGTAMTWVQRVAGGLGGLTLAAVAVLILVTCVTMRR-----   |
| 15 sp          | Q8QZ72.1 | POLS | 99.2%  | 58.1% | YPANHNGVTLPDLSSTAMTWAQHLAGGVGLLIALAVLILVIVTCVTLRR-----   |
| 16 sp          | Q80S27.1 | POLS | 100.0% | 57.4% | FPANHNNVVFDPFSSAVSWLTHTMGGATVIAIGITIFLIVTCIAFSRH-----    |
| 17 sp          | P27285.1 | POLS | 98.8%  | 45.7% | TPHKNDQEFQAATSKTSWSWLFALFGGASSLLIIGLTIFACSMMLTSTRR-----  |
| 18 sp          | P03316.1 | POLS | 98.8%  | 45.7% | TPHKNDQEFQAATSKTSWSWLFALFGGASSLLIIGLMIACSMMLTSTRR-----   |
| 19 sp          | P13890.1 | POLS | 99.6%  | 57.3% | YGASHNNQVFPDMSGTAMTWVQRMASGLGGLALIAVVVLVLVTCITMRR-----   |
| 20 sp          | P08491.3 | POLS | 99.6%  | 58.3% | YGASHNNQVFPDMSGTAMTWVQRLASGLGGLALIAVVVLVLVTCITMRR-----   |
| 21 sp          | Q9JGK8.1 | POLS | 99.8%  | 58.7% | YGASHNNQVFPDMSGTAMTWVQRVAGGLGGLTLAAVAALILVTCVTMRR-----   |
| 22 sp          | Q8JJX0.1 | POLS | 99.8%  | 33.6% | TRPRHGSDPGGYISGPAMRWAGGIVG-TLVVLFILAVIYCVKKCRSKRIRIVKS   |
| 23 sp          | P03315.1 | POLS | 99.6%  | 59.3% | YAASHSNVVFDPMSGTALSWSVQKTSGGLGAFAGAILVLVVTCTIGLRR-----   |
| 24 sp          | Q8QL52.1 | POLS | 100.0% | 33.8% | ARPRHGSDTGGYISGPAMRWAGRIVGNPSGPVSSSLAVTYCVKKCRSKRIRIVKS  |
| 25 sp          | P36329.1 | POLS | 99.0%  | 49.8% | HPQYHAQTFTAAVSKTAWTWLTSLLGGSAVIIIGLVLATIVAMYVLTNQKHN---  |
| 26 sp          | P36330.1 | POLS | 99.0%  | 48.8% | HPQYHAQTFTAAVSKTAWTWLTSLLGGSAVIIIGLVLATIVAMYVLTNQKHN---  |
| 27 sp          | P36331.1 | POLS | 99.0%  | 50.0% | HPQYHAQSFTAAVSKTAWTWLTSLLGGSAVIIIGLVLATIVAMYVLTNQKHN---  |
| 28 sp          | P36332.1 | POLS | 99.0%  | 49.4% | HPQYHAQTFTAAVSKTAWTWLTSLLGGSAVIIIGLVLATIVAMYVLTNQKHN---  |
| 29 sp          | P05674.1 | POLS | 98.8%  | 49.2% | HPQYHAQTFTAAVSKTAWTWLTSLLGGSAVIIIGLVLATIVAMYVLTNQKHN---  |
| 30 sp          | P09592.2 | POLS | 98.8%  | 49.2% | HPQYHAQTFTAAVSKTAWTWLTSLLGGSAVIIIGLVLATIVAMYVLTNQKHN---  |
| 31 sp          | P13897.1 | POLS | 98.8%  | 42.8% | EPHKVDQEFQAAVSKTSWNWLLALFGGASSLIVVGLIVLCSSMLINTRR-----   |
| consensus/100% |          |      |        |       | .....s.....hStsupwh..h.u.....h...hhhhhhs.hh...p.....     |
| consensus/90%  |          |      |        |       | hst.psp.h..shSttuhswlt.lhGu.u.hhhhuhhhhhhshhh.htp.....   |
| consensus/80%  |          |      |        |       | ast.hsp.hhsslSttAhowlptlhGGsuhhlhluhhllhllvnhhshp+p..... |
| consensus/70%  |          |      |        |       | aptphspthhsslSttAhowlptlhGGsusllhlullllhllvshlshp+p..... |

[MView](#) 1.63, Copyright © 1997-2018 [Nigel P. Brown](#)
